# Supplementary material for: Relationship between breast feeding and motor development in children: protocol for a systematic review and meta-analysis
Source: PubMed Central journal article supplement — BMJ Open. 2019 Sep 17;9(9):e029063. doi: 10.1136/bmjopen-2019-029063 (PMC6756461; doi:10.1136/bmjopen-2019-029063), 2019-09-17
Supplement: bmjopen-2019-029063.draft_revisions.pdf [file bmjopen-2019-029063.draft_revisions.pdf]

# BMJ Open

BMJ Open is committed to open peer review. As part of this commitment we make the peer review history of every article we publish publicly available.

When an article is published we post the peer reviewers' comments and the authors' responses online. We also post the versions of the paper that were used during peer review. These are the versions that the peer review comments apply to.

The versions of the paper that follow are the versions that were submitted during the peer review process. They are not the versions of record or the final published versions. They should not be cited or distributed as the published version of this manuscript.

BMJ Open is an open access journal and the full, final, typeset and author-corrected version of record of the manuscript is available on our site with no access controls, subscription charges or pay-per-view fees (<http://bmjopen.bmj.com>).

If you have any questions on BMJ Open's open peer review process please email [editorial.bmjopen@bmj.com](mailto:editorial.bmjopen@bmj.com)

# BMJ Open

## The relationship between exclusive breastfeeding and motor development in children: a protocol for a systematic review and meta-analysis.

|                               |                                                                                                                                                                                                                                                                                                                                                                                                                                                                      |
|-------------------------------|----------------------------------------------------------------------------------------------------------------------------------------------------------------------------------------------------------------------------------------------------------------------------------------------------------------------------------------------------------------------------------------------------------------------------------------------------------------------|
| Journal:                      | <i>BMJ Open</i>                                                                                                                                                                                                                                                                                                                                                                                                                                                      |
| Manuscript ID                 | bmjopen-2019-029063                                                                                                                                                                                                                                                                                                                                                                                                                                                  |
| Article Type:                 | Protocol                                                                                                                                                                                                                                                                                                                                                                                                                                                             |
| Date Submitted by the Author: | 24-Jan-2019                                                                                                                                                                                                                                                                                                                                                                                                                                                          |
| Complete List of Authors:     | Hernandez, Montse<br>Álvarez-Bueno, Celia; Universidad de Castilla-La Mancha, Social and Health Care Research Center<br>Pozuelo-Carrascosa, Diana P; Universidad de Castilla-La Mancha, Social and Health Care Research Center<br>Berlanga-Macías, Carlos; Universidad de Castilla-La Mancha, Social and Health Care Research Center<br>Martinez-Vizcaino, Vicente; Universidad de Castilla-La Mancha, Centro de Estudios Sociosanitarios<br>Notario-Pachezo, Blanca |
| Keywords:                     | breastfeeding, motor development, motor skills, children                                                                                                                                                                                                                                                                                                                                                                                                             |
|                               |                                                                                                                                                                                                                                                                                                                                                                                                                                                                      |

SCHOLARONE™  
Manuscripts

**Protocol manuscript**

The relationship between exclusive breastfeeding and motor development in children: a protocol for a systematic review and meta-analysis.

**Authors and affiliations:**

Monserrat Hernández-Luengo<sup>1,2</sup>, Celia Álvarez-Bueno, Diana P. Pozuelo-Carrascosa<sup>1</sup>, Carlos Berlanga-Macías<sup>1</sup>, Vicente Martínez-Vizcaíno<sup>1,3</sup>, Blanca Notario-Pacheco<sup>1</sup>

<sup>1</sup>Universidad de Castilla-La Mancha, Health and Social Research Center, Cuenca, Spain

<sup>2</sup>Servicio de Salud de Castilla La Mancha (SESCAM)

<sup>3</sup>Universidad Autónoma de Chile, Talca, Chile

**\*Correspondence to:**

Celia Álvarez Bueno

Author's address: C/Santa Teresa Jornet, s/n, cp: 16071, Cuenca

Telephone number: + (34) 969179100 ext. 4659

E-mail: [Celia.AlvarezBueno@uclm.es](mailto:Celia.AlvarezBueno@uclm.es)

**Word count:** 2253

## ABSTRACT

### Introduction:

The recommendations of most scientific societies encourage mothers to keep breastfeeding for at least 6 months, due to the numerous immunologic, cognitive developmental and motor skill benefits that breastfeeding confers. Although the influence of breastfeeding on motor development during childhood has been extensively studied, the findings are inconsistent, and some studies have even reported no effect. This manuscript presents a protocol for a systematic review and meta-analysis, with the aim of reviewing the relationship between breastfeeding and motor skill development in children; in terms of duration, exclusivity or non-exclusivity of breastfeeding, based on data from published observational studies.

### Methods and analysis:

To identify relevant studies, the search will be conducted using MEDLINE (via PubMed), EMBASE, Web of Science and Cochrane Library. Observational studies (Cross-sectional and follow up studies) written in English or Spanish that investigate the association between breastfeeding and motor development in children will be included. This systematic review and meta-analysis protocol follows the Preferred Reporting Items for Systematic Review and Meta-Analysis Protocols (PRISMA-P). A Critical Appraisal Checklist for Analytical Cross-Sectional Studies and The Newcastle-Ottawa Quality Assessment Scale for longitudinal studies will be used to assess the quality of included studies. The effect of breastfeeding on motor skill development will be calculated as the primary outcome. Subgroup analyses will be carried out based on the characteristics of motor skill development and the population included.

### Ethics and dissemination

Ethical approval is not required because the data used for will be obtained from published studies and there will be no concerns about privacy. The findings from this study will be relevant information regarding the association of breastfeeding and motor development in children, and could be used encourage to improve breastfeeding rates. The results will be published in a peer-reviewed journal.

**Trial registration number:** PROSPERO CRD42018093706. (24/04/2018)

**Keywords:** breastfeeding, motor development, motor skills, children.

### Strengths and limitations of this study

- This review will present a comprehensive and standardised methodology, according to an established framework, to identify relevant studies that analyse the effect of breastfeeding on motor skills.
- Analysis of different sources of heterogeneity and the assessment of risk of bias of the included studies will be performed independently by two researchers.
- To identify studies that aim to determine the association between breastfeeding and motor development, an exhaustive literature search will be carried out.
- This study could be limited by the quality of available studies, insufficient methodological rigor and statistical heterogeneity.
- Different methods used for measuring breastfeeding and motor development from observational studies may be another limitation to the quality of evidence of this study.

## INTRODUCTION

The first two years of a child's life is a critical period for health, growth and development; all of which are affected by nutritional status. It is well documented that breastfeeding provides many important health benefits to children and mothers, and this is considered the gold standard in infant feeding.<sup>1,2</sup>

The World Health Organization (WHO) recommends exclusive breastfeeding for the first 6 months of life as an ideal feed, and continuation of breastfeeding for at least the first and second years to supplement the introduction of complementary feed. There is no evidence against this recommendation,<sup>1,2,3,4</sup> which is also supported by many scientific and practitioner associations.<sup>5,6,7</sup> The World Health Assembly, as part of its Global Strategy for the Feeding of Infants and Young Children, encouraged Member States to promote exclusive breastfeeding for 6 months as a global public health recommendation which provides many benefits to babies, reduces the risk of diseases and helps to promote good physical and cognitive growth.<sup>8,9</sup>

However, the rates of breastfeeding at 6 months of age remain low in Europe; and even in countries where initial rates are high, there is a marked decrease by the sixth month.<sup>10,11,12</sup> Early cessation of breastfeeding and the introduction of solids before 4 months can have considerable adverse effects on the health of women and children.<sup>12,13,14,15</sup> Therefore, it is important to consider what is causing the failure to comply with recommendations, and there is a need for greater efforts to disseminate the benefits of breastfeeding and create a social environment that favours it.

Although infant development is a process that is influenced by several factors, breastfeeding in the first months of life is a key determinant for optimal growth and adequate cognitive and motor development. Additionally, breastfeeding prevents gastrointestinal infection and decreases the risk of diseases later in life such as allergies, asthma, obesity and celiac disease.<sup>2,3,7,9,12,16,17</sup>

Thus, motor development and cognitive function represent indicators of overall development during the first years.<sup>18,19</sup> Although consistent evidence of the positive effects of extended breastfeeding on cognitive function has been reported,<sup>20</sup> few studies have focused on motor development. The relationship between motor development and breastfeeding is difficult to analyse because incomplete control for confounders is reported in the current literature, even when various assessments of motor milestones are

1  
2  
3 considered across studies. To date, no clear associations between the duration of  
4 breastfeeding and motor development have been reported.<sup>21,22,23,24</sup>  
5  
6

7 The purpose of this study protocol is to provide a clear methodology to review the effects  
8 of breastfeeding practices on motor development in children, in terms of duration and  
9 exclusive or not exclusive breastfeeding.  
10  
11  
12  
13  
14

## 15 **OBJECTIVE**

16  
17 The aim of this protocol study is to present an objective and transparent methodology  
18 with which to conduct a systematic review and meta-analysis aimed to increase  
19 knowledge and understanding of the associations between the duration and exclusivity of  
20 breastfeeding and motor development in early childhood.  
21  
22  
23  
24  
25  
26  
27

## 28 **METHODS AND ANALYSIS**

29  
30 The methodology of this protocol was developed in accordance with the Preferred  
31 Reporting Items for Systematic Reviews and Meta-analyses Protocols (PRISMA-P)<sup>25</sup>.  
32 The Meta-analysis of observational studies in epidemiology: a proposal for reporting  
33 (MOOSE<sup>26</sup>), PRISMA and Cochrane Collaboration Handbook<sup>27</sup> will be used to guide the  
34 review methods. This protocol was registered with PROSPERO, (Registration number  
35 CRD42018093706) on 24 April 2018.  
36  
37  
38  
39  
40  
41  
42  
43  
44

### 45 **Inclusion/exclusion criteria for study selection**

46 Studies will be retrieved from the literature by searching for studies which measure the  
47 effects of breastfeeding duration and exclusivity, and report any type of measure of motor  
48 development. To be considered inclusion, studies will be required to meet the following  
49 criteria: (i) participants, children who have not received supplementation in feeding; (ii)  
50 exposure, studies that measure the effect of breastfeeding in terms of duration and  
51 exclusivity and report any type of measure; (iii) outcome, studies in which motor  
52 development is an outcome measured using standardised tests; and (iv) study design,  
53 observational studies (cross-sectional or longitudinal design) that are written in English  
54 or Spanish.  
55  
56  
57  
58  
59  
60

1  
2  
3 Studies will be excluded when: (i) they include infants born in multiple pregnancies with  
4 congenital infections or special circumstances requiring intensive care or hospitalization  
5 during the neonatal period or children with mental disorders or any detected delay in  
6 communication, cognition or motor skills (ii) studies where breast milk has been  
7 supplemented and (iii) studies which have already been used in other similar reviews.  
8  
9  
10  
11  
12

### 13 **Search methods for the identification of studies**

#### 14 **Search strategy**

15  
16  
17 The literature search will be conducted in MEDLINE (via PubMed), EMBASE, Web of  
18 Science and Cochrane Library. The searches will be reviewed immediately prior to the  
19 final analysis in order to identify further potential studies. Study records will be managed  
20 using the Mendeley reference manager. The following search terms will be combined to  
21 conduct the search: breastfeeding, feeding, 'exclusive breastfeeding', breastfed, 'breast  
22 suckling', suckling, 'motor skill', 'psychomotor performance', 'motor development',  
23 'psychomotor development', 'development milestones', children, child, infant,  
24 childhood, 'observational study', 'cohort study', 'population-based' and 'cross sectional'  
25 (Table 1). Previous reviews and meta-analyses will be screened, as well as the reference  
26 lists of the selected studies.  
27  
28  
29  
30  
31  
32  
33  
34  
35  
36  
37  
38  
39  
40  
41  
42  
43  
44  
45  
46  
47  
48  
49  
50  
51  
52  
53  
54  
55  
56  
57  
58  
59  
60



**Table 1** Search strategy for MEDLINE database

|                   |     |                |     |           |     |                |
|-------------------|-----|----------------|-----|-----------|-----|----------------|
| Breastfeeding     | AND | 'motor skills' | AND | children  | AND | 'observational |
| OR                |     | OR             |     | OR        |     | study'         |
| feeding           |     | 'psychomotor   |     | child     |     | OR             |
| OR                |     | performance'   |     | OR        |     | 'cohort study' |
| 'exclusive        |     | OR             |     | infant    |     | OR             |
| breastfeeding'    |     | 'motor         |     | OR        |     | 'population-   |
| OR                |     | development'   |     | childhood |     | based'         |
| breastfed         |     | OR             |     |           |     | OR             |
| OR                |     | 'psychomotor   |     |           |     | 'cross         |
| 'breast suckling' |     | development'   |     |           |     | sectional'     |
| OR                |     | OR             |     |           |     |                |
| 'suckling'        |     | 'motor         |     |           |     |                |
|                   |     | development    |     |           |     |                |
|                   |     | milestones'    |     |           |     |                |

### Selection of studies and data extraction

Two researchers will screen all relevant titles and abstracts of the retrieved publications to identify eligible studies. Inclusion and exclusion criteria will be applied to full texts to identify all potentially eligible articles. Inconsistencies in data collection will be solved by consensus. A third reviewer will be consulted when disagreements persist. The process of identifying, screening and including/excluding articles will be illustrated using the PRISMA<sup>25</sup> flow chart (Figure 1).

Finally, information about the main characteristics of the identified studies will be extracted, including the following data: i) first author's name, ii) publication year, iii) country, iv) study design, v) characteristics of the study population (sample size, age of children at evaluation, gender and number of participants in each group), vi) breastfeeding category (as defined in Table 2) and vii) test used for assessment of motor development (Table 2). The authors of the included studies will be contacted to request any missing data.

**Table 2** Characteristics of studies included in the systematic review and/or meta-analysis

| Reference                                   | Country | Study design        | Population             |                             | Breastfeeding                                                  |                                                    | Outcome MD                    |                            |
|---------------------------------------------|---------|---------------------|------------------------|-----------------------------|----------------------------------------------------------------|----------------------------------------------------|-------------------------------|----------------------------|
|                                             |         |                     | Sample size            | Sample age                  | Categories                                                     | n                                                  | Tool                          | Measurement                |
| First author's name and year of publication | Country | Design of the study | Number of participants | Age of participants (years) | Duration periods of exclusive breastfeeding /any breastfeeding | Number participants in each breastfeeding category | Instrument used to measure MD | Measure used to express MD |

Key: MD, Motor Development

### Assessment of risk of bias

Two independent researchers will be blinded to the authors, titles and years of publication of the included studies to evaluate the risk of bias of each included study. The Critical Appraisal Checklist for Analytical Cross-Sectional Studies from The Joanna Briggs Institute will be used.<sup>28</sup> This tool evaluates the risk of bias according to eight items which are scored as “Yes”, “No”, “Unclear” or “Not applicable”.

The Newcastle-Ottawa Quality Assessment Scale<sup>29</sup> will be used to assess the risk of bias of longitudinal studies, including case control and cohort studies. This tool evaluates the risk of bias according to eight items which are grouped in three categories: selection, comparability and exposure or outcome (for case control or cohort studies, respectively). Each study can be awarded one star for each item within the selection and exposure categories, and a maximum of two stars in the comparability category. Any disagreements over the assessment of quality will be solved by consensus. A third researcher will be consulted if a consensus is not reached.

### Statistical analysis

After data extraction, the reviewers will determine whether meta-analysis is possible. At least four studies addressing the association between breastfeeding and motor development will be required in order to conduct a meta-analysis. If meta-analysis is possible, STATA V.15 software will be used to compute the pooled effect size (ES) estimates with 95% confidence intervals (CIs). The standardized mean difference will be

1  
2  
3 calculated for each breastfeeding category as an estimate of ES,<sup>30</sup> using Cohen's d index  
4 as the ES statistic. We will compare the level of motor development in children who have  
5 never been breastfed, as a reference group, with children who have been exclusively  
6 breastfed or breastfed for any length of time. If possible, a comparison between children  
7 breastfed for at least 6 months and children breastfed for less than 6 months will also be  
8 carried out.  
9

10  
11  
12  
13  
14 A fixed-effects model<sup>31</sup> will be used in the case of no heterogeneity; otherwise, a random-  
15 effects model<sup>32</sup> will be used. Heterogeneity will be assessed by computing the I<sup>2</sup> statistic  
16 to quantify inconsistencies and variability within the meta-analysis.<sup>33</sup> The values of I<sup>2</sup>  
17 will be considered as follows: 0%–40% might not be important, 30%–60% may represent  
18 moderate heterogeneity, 50%–90% may represent substantial heterogeneity and 75%–  
19 100% represents considerable heterogeneity.  
20  
21  
22  
23  
24

25 Linear meta-analysis regression models will be used to explore the impact of covariates,  
26 directed by the results of heterogeneity analysis. Finally, publication bias will be  
27 evaluated using a funnel plot according to the method proposed by Egger.<sup>34</sup> When a meta-  
28 analysis is not feasible, we will perform a narrative synthesis.  
29  
30  
31  
32

### 33 *Subgroup analysis and meta-regression*

34  
35  
36 If enough studies are available, subgroup analysis will be conducted. Subgroup and meta-  
37 regression analyses will be carried out on the main factors causing heterogeneity, such as  
38 the type of motor development assessment (i.e., gross or fine motor), gender, age of study  
39 participants, birth weight, breastfeeding classification (never, less than 6 months or more  
40 than 6 months) and aspects related to motor skills such as the type of measure used.  
41 Furthermore, the design and risk of bias scores of the studies will be considered for  
42 additional subgroup analysis. Additional potential moderating variables may be identified  
43 after reviewing the literature.  
44  
45  
46  
47  
48  
49  
50  
51

### 52 *Sensitivity analysis*

53  
54 We will perform sensitivity analysis to assess whether the findings are robust over the  
55 assumptions made. These analyses will be conducted by removing studies one by one  
56 from the main analysis.  
57  
58  
59  
60

### **No patient and Public Involvement**

Existing databases will be used for the purpose of this study. Patients and public will not be involved in the design of this study. This review will assess the effect of breastfeeding on motor developmental outcomes in infants. Insights provided by this study could be used in clinical practice to ameliorate outcomes; specifically, motor development; of children in the population.

### **DISCUSSION**

The aim of this study is to present an objective and transparent methodology with which to conduct a systematic review and meta-analysis investigating whether the duration of breastfeeding is associated with motor development and the child's developmental status.

Many studies have examined whether breastfeeding in early life, a critical phase of development, could affect later cognitive function and motor development in children.<sup>18,19,20</sup> Infant development is a complex process, which encompasses several factors that allow the acquisition of skills that will contribute to a child's full participation in activities and will help to establish a direct relationship with the environment.<sup>18</sup>

Motor function is an accepted indicator of development during the first years of life.<sup>35,36,37</sup> It directly contributes to and reflects the relationship that the child establishes with the physical and social environments. In addition, motor development plays an important role in other areas of development, such as physical growth and cardiorespiratory fitness, the latter being a powerful and effective indicator of cardiovascular health.<sup>38,39,40</sup> Poor motor development performance may incline children towards activity avoidance and sedentary behaviours, which are linked to increased risk of chronic disease in adulthood.<sup>41</sup>

There is considerable evidence about the long- and short-term benefits of breastfeeding for infant health.<sup>16,17</sup> However, no consensus has been reached about the effects of breastfeeding on motor development, and the results and conclusions of existing studies are controversial.<sup>19,23,24</sup> The complexity of child development makes it difficult to evaluate these effects, and certain aspects of infant development are influenced by psychosocial and socioeconomic factors, which could contribute to some of the observed differences. The scientific evidence regarding the benefits of breastfeeding in terms of

1  
2  
3 motor development outcomes is weak, and the strength of this association is controversial  
4 because most studies lack adequate control for potential confounders. Furthermore,  
5 previous studies have measured infant development using different standardised tests.  
6  
7

8  
9 Potential limitations of this research could include publication bias, information bias, lack  
10 of consultation of grey literature, inclusion of articles in English and Spanish only,  
11 analysis of cross-sectional studies as this does not allow a causal association to be  
12 evaluated (breastfeeding always precedes motor development), poor statistical analysis  
13 and inadequate reporting of methods and findings of the primary studies. To overcome  
14 these limitations, the study will be conducted and reported by two independent reviewers,  
15 and inconsistencies in data collection will be solved by consensus. Furthermore; existing  
16 guidelines, the MOOSE statement, PRISMA, and Cochrane Collaboration Handbook  
17 recommendations will be followed.  
18  
19

20  
21 To summarise, we will carry out a systematic review and meta-analysis with the objective  
22 of reviewing existing literature on the relationship between breastfeeding and motor  
23 development. Despite the fact that some aspects of motor development appear to be  
24 controversial, if this study confirms the positive effects of breastfeeding on motor skill  
25 development through analysis of the evidence, it could encourage greater interest in  
26 breastfeeding within the areas of public and child health.  
27  
28

29  
30 This situation highlights the need for guidelines or recommendations that are based on  
31 rigorous and updated bibliographical review of the best available scientific evidence, for  
32 use in daily practice to improve the quality and effectiveness of interventions. This could  
33 lead to an improvement in the health status and development of children worldwide.  
34  
35

## 36 37 38 39 40 41 42 43 44 45 46 **ETHICS AND DISSEMINATION**

47  
48 The data included in this project will be provide by the original studies; therefore, ethical  
49 approval and informed consent of patients will not be required.  
50

51  
52 This protocol provides a clear and structured procedure to extract relevant information on  
53 the association of breastfeeding and motor milestones. This study will have clinical and  
54 public health implications, because it could provide support for recommendations of  
55 breastfeeding, which might help to prevent low rates of breastfeeding and early  
56 abandonment. Suggestions for future research will be made according to the findings of  
57  
58  
59  
60

1  
2  
3 this systematic review and meta-analysis, and evidence-based recommendations to  
4 improve breastfeeding rates will be offered, due to the involvement of this practice in  
5 children's development.  
6  
7

### 8 9 **Contributors:**

10  
11 BN-P and MH-L designed the study. BN-P was the principal investigator and guarantor.  
12  
13 BN-P and MH-L were the main coordinators of the study. DPP-C, CA-B, CB-C, VM-V  
14 and BN-P conducted the study. MH-L, DPP-C and VM-V gave statistical and  
15 epidemiological support. MH-L wrote the article with the support of CB-C, VM-V and  
16 BN-P. All authors reviewed and approved the final version of the manuscript.  
17  
18  
19

### 20 21 **Competing interests:**

22  
23 All authors have completed the ICMJE uniform disclosure form at  
24 [www.icmje.org/coi\\_disclosure.pdf](http://www.icmje.org/coi_disclosure.pdf) and declare: no support from any organisation for the  
25 submitted work; no financial relationships with any organisations that might have an  
26 interest in the submitted work in the previous three years; no other relationships or  
27 activities that could appear to have influenced the submitted work.  
28  
29  
30

### 31 32 **Funding statement:**

33  
34 This work was not supported by any external grants or funding.  
35  
36

### 37 38 **Data sharing:**

39  
40 Extra data is available by emailing: [celia.alvarezbueno@uclm.es](mailto:celia.alvarezbueno@uclm.es)  
41

### 42 43 **Transparency**

44  
45 The manuscripts guarantor (BN-P) affirms that the manuscript is an honest, accurate, and  
46 transparent account of the study being reported; that no important aspects of the study  
47 have been omitted; and that any discrepancies from the study as planned have been  
48 explained.  
49  
50  
51  
52  
53  
54  
55  
56  
57  
58  
59  
60

**REFERENCES**

1. World Health Organization/UNICEF. *Global Strategy for Infant and Young Child Feeding*. Geneva: WHO, 2003.
2. Kramer MS, Kaluma R. Optimal duration of exclusive breastfeeding. *Cochrane Database of Syst Rev*. 2012;8:CD003517.
3. World Health Organization. *Infant and young child feeding*. Geneva: WHO 2017.
4. Organización Panamericana de la Salud. *Principios de Orientación para la Alimentación complementaria del niño amamantado*. Washington DC: PAHO, 2003.
5. Kleinman RE, Greer FR. American Academy of Pediatrics Committee on Nutrition. Complementary feeding. *Pediatric Nutrition*. 7th ed. Elk Grove Village, IL: American Academy of Pediatrics; 2014. p. 123.
6. Infant Feeding Guidelines. From birth to 12 months. 2015. [www.gov.wales](http://www.gov.wales). Accessed 28 May 2018.
7. Fewtrell M, Bronsky J, Campoy C, Domellöf M, Embleton N, Fidler Mis N, et al. Complementary feeding: A position Paper by the European Society for Paediatric Gastroenterology, Hepatology, and Nutrition (ESPGHAN) Committee on nutrition. *J Pediatr Gastroenterol Nutr*. 2017;64:119–132.
8. World Health Organization. *65ª Asamblea Mundial de la Salud. Plan de aplicación integral sobre nutrición materna, del lactante y del niño pequeño*. OMS; 2012.
9. Vestergaard M, Obel C, Henriksen TB, Sorensen HT, Skajaa, E, Ostergaard J. Duration of breastfeeding and developmental milestones during the latter half of infancy. *Acta Paediatr*. 1999;88:1327–1332.
10. Comité de Lactancia Materna de la Asociación Española de Pediatría. *Lactancia Materna en cifras: Tasas de inicio y duración de la Lactancia Materna en España y otros países*. 2016
11. Rius JM, Ortuño J, Rivas C, Maravall M, Calzado MA, López A, et al. Factores asociados al abandono precoz de la lactancia materna en una región del este de España. *An Pediatr (Barc)*. 2014;80:6–15.
12. Smith HA, Becker GE. Early additional food and fluids for healthy breastfed full-term infants. *Cochrane Database Syst Rev*. 2016;8:CD006462.

- 1  
2  
3 13. Chowdhury R, Sinha B, Sankar MJ, Taneja S, Bhandari N, Bahl R, et al.  
4 Breastfeeding and maternal health outcomes: a systematic review and meta-  
5 analysis. *Acta Paediatr Suppl.* 2015;104:96–113.  
6  
7
- 8 14. European Food Safety Authority. Panel on Dietetic Products NAD: Scientific  
9 opinion on the appropriate age for introduction of complementary feeding of  
10 infants. *Eur Food Safet Authority J.* 2009;7:1423.  
11  
12
- 13 15. Quasen W, Fenton TR, Friel JK. Age of introduction of first complementary  
14 feeding for infants: a systematic review. *BMC Pediatr.* 2015:107.  
15  
16
- 17 16. Horta BL, Victoria CG. Short-term effects of breastfeeding a systematic review  
18 of benefits of breastfeeding on diarrhoea and pneumonia mortality. Geneva:  
19 World Health Organization; 2013.  
20  
21
- 22 17. Horta BL, Victoria CG. Long-term effects of breastfeeding: a systematic review.  
23 Geneva: World Health Organization; 2013.  
24  
25
- 26 18. Pollitt E, Caycho T. Desarrollo motor como indicador del desarrollo infantil  
27 durante los primeros dos años de vida. *Revista de Psicología:* 2010;28:381–409.  
28 Available at: <http://www.redalyc.org/articulo.oa?id=337829515007>> ISSN 0254-  
29 9247. Accessed on 26 August 2018.  
30  
31
- 32 19. Michels KA, Ghassabian A, Mumford SL, Sundaram R, Bell EM, Bello SC, et al.  
33 Breastfeeding and motor development in term and preterm infants in a  
34 longitudinal US cohort. *Am J Clin Nutr.* 2017;106(6):1456–1462.  
35  
36  
37
- 38 20. Anderson JW, Johnstone BM, Remley DT. Breast-feeding and cognitive  
39 development: a meta-analysis. *Am J Clin Nutr.* 1999;70:525–535.  
40  
41  
42
- 43 21. Thorsdottir I, Gunnarsdottir I, Kvaran MA, Gretarsson SJ. Maternal body mass  
44 index, duration of exclusive breastfeeding and children's developmental status at  
45 the age of 6 years. *Eur J Clin Nutr.* 2005 Mar;59(3):426–431.  
46  
47  
48
- 49 22. Chiu WC, Liao HF, Chang PJ, Chen PC, Chen YC. Duration of breast feeding and  
50 risk of developmental delay in Taiwanese children: a nationwide birth cohort  
51 study. *Paediatr Perinat Epidemiol.* 2011;25:519–527  
52  
53
- 54 23. Sacker A, Quigley MA, Kelly YJ. Breastfeeding and developmental delay:  
55 findings from the millennium cohort study. *Pediatrics.* 2006;118:e682–e689.  
56  
57  
58  
59  
60



24. Dee DL, Li R, Lee LC, Grummer-Strawn LM. Associations between breastfeeding practices and young children's language and motor skill development. *Pediatrics*. 2007;119(Suppl. 1):S92–S98.
25. Moher D, Shamseer L, Clarke M, Ghersi D, Liberati A, Petticreq M, et al. Preferred reporting items for systematic review and meta-analysis protocols (PRISMA-P) 2015 statement. *Syst Rev*. 2015;4:1.
26. Stroup DF, Berlin JA, Morton SC, et al. Meta-analysis of observational studies in epidemiology: a proposal for reporting. Meta-analysis Of Observational Studies in Epidemiology (MOOSE) group. *JAMA* 2000;283:2008–2012.
27. Higgins JPT, Green S. *Cochrane Handbook for Systematic Reviews of Interventions*. John Wiley & Sons 2011.
28. Moola S, Munn Z, Tufanaru C, Aromataris E, Sears K, Sfetcu R, et al. Chapter 7: Systematic reviews of etiology and risk. In: Aromataris E, Munn Z, editors. *Joanna Briggs Institute Reviewer's Manual*. The Joanna Briggs Institute, 2017. Available from <https://reviewersmanual.joannabriggs.org/>.
29. Wells GA, Shea B, O'Connell D, Peterson J, Welch V, Losos M, et al. *The Newcastle-Ottawa Scale (NOS) for Assessing the Quality of Nonrandomised Studies in Metaanalyses*. Ottawa: Ottawa Hospital Research Institute. Available from: [http://www.ohri.ca/programs/clinical\\_epidemiology/oxford.asp](http://www.ohri.ca/programs/clinical_epidemiology/oxford.asp). Accessed 31 May 2018.
30. Lipsey M, Wilson D. *Practical meta-analysis*. Thousand Oaks, CA: Sage Publications, 2001.
31. Leonard T, Duffy JC. A Bayesian fixed effects analysis of the Mantel-Haenszel model applied to meta-analysis. *Stat Med*. 2002;21:2295–2312.
32. DerSimonian R, Kacker R. Random-effects model for meta-analysis of clinical trials: An update. *Contemp Clin Trials*. 2007;28:105–114.
33. Higgins JPT, Thompson SG. Quantifying heterogeneity in a meta-analysis. *Stat Med*. 2002;21:1539–1558.
34. Egger M, Davey Smith G, Schneider M, Minder C. Bias in meta-analysis detected by a simple, graphical test. *BMJ*. 1997;315:629–634.

- 1  
2  
3 35. Rigby M, Köhler L, Mitch E. Blair, Metchler R. Child health indicators for  
4 Europe: a priority for a caring society. *Eur J Public Health*. 2003;13(3 Suppl):38–  
5 46.  
6  
7  
8  
9 36. Köhler L, Rigby M. Indicators of children's development: considerations when  
10 constructing a set of national Child Health Indicators for the European Union.  
11 *Child Care Health Dev*. 2003;29:551–558.  
12  
13  
14  
15 37. The WHO Multicentre Growth Reference Study (MGRS): Rationale, planning,  
16 and implementation. Available from  
17 <http://www.who.int/childgrowth/mgrs/fnu/en/index.html>. Accessed 15 June  
18 2018.  
19  
20  
21  
22 38. Artero EG, Ortega FB, España-Romero V, Labayen I, Huybrechts I, Papadaki A,  
23 et al. Longer breastfeeding is associated with increased lower body explosive  
24 strength during adolescence. *J Nutr*. 2010;140:1989–1995.  
25  
26  
27  
28 39. Ortega F, Ruiz J, Castillo M, Sjöström M. Physical fitness in childhood and  
29 adolescence: a powerful marker of health. *Int J Obes (Lond)*. 2008;32:1–11.  
30  
31 40. Kodama S, Saito K, Tanaka S, Maki M, Yachi Y, Asumi M, et al.  
32 Cardiorespiratory fitness as a quantitative predictor of all-cause mortality and  
33 cardiovascular events in healthy men and women. *JAMA* 2009;301:2024–2035  
34  
35  
36  
37 41. Lucas BR, Elliott EJ, Coggan S, Pinto RZ, Jinkowic T, McCoy SW, et al.  
38 Interventions to improve gross motor performance in children with  
39 neurodevelopmental disorders: a meta-analysis. *BMC Pediatr*. 2016;16:193.  
40  
41  
42  
43  
44

## 45 TABLES LEGENDS

46  
47 **Table 1.** Search strategy for the MEDILINE database.  
48

49  
50 **Table 2.** Characteristics of studies included in the systematic review and/or meta-  
51 analysis.  
52

## 53 FIGURE LEGENDS

54  
55  
56 **Figure 1.** PRISMA (Preferred Reporting Items for Systematic Review and Meta-  
57 Analysis) flow diagram of identification, screening, eligibility and inclusion of studies  
58  
59  
60

1  
2  
3  
4  
5  
6  
7  
8  
9  
10  
11  
12  
13  
14  
15  
16  
17  
18  
19  
20  
21  
22  
23  
24  
25  
26  
27  
28  
29  
30  
31  
32  
33  
34  
35  
36  
37  
38  
39  
40  
41  
42  
43  
44  
45  
46  
47  
48  
49  
50  
51  
52  
53  
54  
55  
56  
57  
58  
59  
60

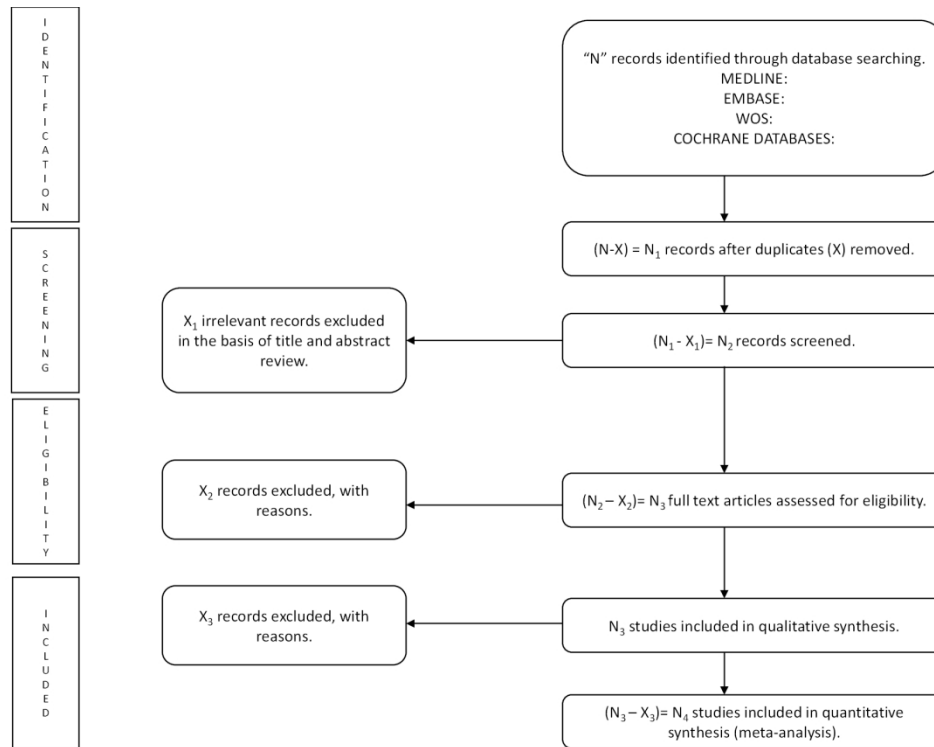

Figure 1 Literature search Preferred Reporting Items for Systematic Reviews and Meta-analyses (PRISMA) flow diagram of identification, screening, eligibility and inclusion of studies.

169x127mm (300 x 300 DPI)

**PRISMA-P (Preferred Reporting Items for Systematic review and Meta-Analysis Protocols) 2015 checklist: recommended items to address in a systematic review protocol\***

| Section and topic                 | Item No | Checklist item                                                                                                                                                                                                                |
|-----------------------------------|---------|-------------------------------------------------------------------------------------------------------------------------------------------------------------------------------------------------------------------------------|
| <b>ADMINISTRATIVE INFORMATION</b> |         |                                                                                                                                                                                                                               |
| Title:                            |         |                                                                                                                                                                                                                               |
| Identification: p. 1              | 1a      | Identify the report as a protocol of a systematic review                                                                                                                                                                      |
| Update: NA                        | 1b      | If the protocol is for an update of a previous systematic review, identify as such                                                                                                                                            |
| Registration: p. 2                | 2       | If registered, provide the name of the registry (such as PROSPERO) and registration number                                                                                                                                    |
| Authors: pp. 1, 13                |         |                                                                                                                                                                                                                               |
| Contact: p. 1                     | 3a      | Provide name, institutional affiliation, e-mail address of all protocol authors; provide physical mailing address of corresponding author                                                                                     |
| Contributions: p. 13              | 3b      | Describe contributions of protocol authors and identify the guarantor of the review                                                                                                                                           |
| Amendments: NA                    | 4       | If the protocol represents an amendment of a previously completed or published protocol, identify as such and list changes; otherwise, state plan for documenting important protocol amendments                               |
| Support: NA                       |         |                                                                                                                                                                                                                               |
| Sources                           | 5a      | Indicate sources of financial or other support for the review                                                                                                                                                                 |
| Sponsor                           | 5b      | Provide name for the review funder and/or sponsor                                                                                                                                                                             |
| Role of sponsor or funder         | 5c      | Describe roles of funder(s), sponsor(s), and/or institution(s), if any, in developing the protocol                                                                                                                            |
| <b>INTRODUCTION</b>               |         |                                                                                                                                                                                                                               |
| Rationale: pp 4, 5                | 6       | Describe the rationale for the review in the context of what is already known                                                                                                                                                 |
| Objectives p. 5                   | 7       | Provide an explicit statement of the question(s) the review will address with reference to participants, interventions, comparators, and outcomes (PICO)                                                                      |
| <b>METHODS</b>                    |         |                                                                                                                                                                                                                               |
| Eligibility criteria: pp. 5, 6    | 8       | Specify the study characteristics (such as PICO, study design, setting, time frame) and report characteristics (such as years considered, language, publication status) to be used as criteria for eligibility for the review |
| Information sources: p. 6         | 9       | Describe all intended information sources (such as electronic databases, contact with study authors, trial registers or other grey literature sources) with planned dates of coverage                                         |
| Search strategy: pp. 6, 7         | 10      | Present draft of search strategy to be used for at least one electronic database, including planned limits, such that it could be repeated                                                                                    |
| Study records: pp. 7, 8           |         |                                                                                                                                                                                                                               |
| Data management: p. 7             | 11a     | Describe the mechanism(s) that will be used to manage records and data throughout the review                                                                                                                                  |

|    |                                          |     |                                                                                                                                                                                                                                                  |
|----|------------------------------------------|-----|--------------------------------------------------------------------------------------------------------------------------------------------------------------------------------------------------------------------------------------------------|
| 1  |                                          |     |                                                                                                                                                                                                                                                  |
| 2  |                                          |     |                                                                                                                                                                                                                                                  |
| 3  | Selection process: p. 7                  | 11b | State the process that will be used for selecting studies (such as two independent reviewers) through each phase of the review (that is, screening, eligibility and inclusion in meta-analysis)                                                  |
| 4  |                                          |     |                                                                                                                                                                                                                                                  |
| 5  | Data collection process: p. 7            | 11c | Describe planned method of extracting data from reports (such as piloting forms, done independently, in duplicate), any processes for obtaining and confirming data from investigators                                                           |
| 6  |                                          |     |                                                                                                                                                                                                                                                  |
| 7  | Data items: pp 7, 10                     | 12  | List and define all variables for which data will be sought (such as PICO items, funding sources), any pre-planned data assumptions and simplifications                                                                                          |
| 8  |                                          |     |                                                                                                                                                                                                                                                  |
| 9  |                                          |     |                                                                                                                                                                                                                                                  |
| 10 | Outcomes and prioritization: pp. 7, 8    | 13  | List and define all outcomes for which data will be sought, including prioritization of main and additional outcomes, with rationale                                                                                                             |
| 11 |                                          |     |                                                                                                                                                                                                                                                  |
| 12 | Risk of bias in individual studies: p. 8 | 14  | Describe anticipated methods for assessing risk of bias of individual studies, including whether this will be done at the outcome or study level, or both; state how this information will be used in data synthesis                             |
| 13 |                                          |     |                                                                                                                                                                                                                                                  |
| 14 | Data synthesis: pp 9, 10                 | 15a | Describe criteria under which study data will be quantitatively synthesised                                                                                                                                                                      |
| 15 |                                          | 15b | If data are appropriate for quantitative synthesis, describe planned summary measures, methods of handling data and methods of combining data from studies, including any planned exploration of consistency (such as $I^2$ , Kendall's $\tau$ ) |
| 16 |                                          | 15c | Describe any proposed additional analyses (such as sensitivity or subgroup analyses, meta-regression)                                                                                                                                            |
| 17 |                                          | 15d | If quantitative synthesis is not appropriate, describe the type of summary planned                                                                                                                                                               |
| 18 |                                          |     |                                                                                                                                                                                                                                                  |
| 19 | Meta-bias(es): NA                        | 16  | Specify any planned assessment of meta-bias(es) (such as publication bias across studies, selective reporting within studies)                                                                                                                    |
| 20 |                                          |     |                                                                                                                                                                                                                                                  |
| 21 | Confidence in cumulative evidence: NA    | 17  | Describe how the strength of the body of evidence will be assessed (such as GRADE)                                                                                                                                                               |
| 22 |                                          |     |                                                                                                                                                                                                                                                  |

**\* It is strongly recommended that this checklist be read in conjunction with the PRISMA-P Explanation and Elaboration (cite when available) for important clarification on the items. Amendments to a review protocol should be tracked and dated. The copyright for PRISMA-P (including checklist) is held by the PRISMA-P Group and is distributed under a Creative Commons Attribution Licence 4.0.**

*From: Shamseer L, Moher D, Clarke M, Ghersi D, Liberati A, Petticrew M, Shekelle P, Stewart L, PRISMA-P Group. Preferred reporting items for systematic review and meta-analysis protocols (PRISMA-P) 2015: elaboration and explanation. BMJ. 2015 Jan 2;349(jan02 1):g7647.*

# BMJ Open

## The relationship between breastfeeding and motor development in children: a protocol for a systematic review and meta-analysis.

|                                 |                                                                                                                                                                                                                                                                                                                                                                                                                                                                                                                                                                                                                  |
|---------------------------------|------------------------------------------------------------------------------------------------------------------------------------------------------------------------------------------------------------------------------------------------------------------------------------------------------------------------------------------------------------------------------------------------------------------------------------------------------------------------------------------------------------------------------------------------------------------------------------------------------------------|
| Journal:                        | <i>BMJ Open</i>                                                                                                                                                                                                                                                                                                                                                                                                                                                                                                                                                                                                  |
| Manuscript ID                   | bmjopen-2019-029063.R1                                                                                                                                                                                                                                                                                                                                                                                                                                                                                                                                                                                           |
| Article Type:                   | Protocol                                                                                                                                                                                                                                                                                                                                                                                                                                                                                                                                                                                                         |
| Date Submitted by the Author:   | 26-Jun-2019                                                                                                                                                                                                                                                                                                                                                                                                                                                                                                                                                                                                      |
| Complete List of Authors:       | Hernández Luengo, Monserrat; Universidad de Castilla-La Mancha, Social and Health Care Research Center<br>Álvarez-Bueno, Celia; Universidad de Castilla-La Mancha, Social and Health Care Research Center<br>Pozuelo-Carrascosa, Diana P; Universidad de Castilla-La Mancha, Social and Health Care Research Center<br>Berlanga-Macías, Carlos; Universidad de Castilla-La Mancha, Social and Health Care Research Center<br>Martinez-Vizcaino, Vicente; Universidad de Castilla-La Mancha, Centro de Estudios Sociosanitarios<br>Notario-Pacheco, Blanca; Universidad de Castilla-La Mancha, Faculty of Nursing |
| <b>Primary Subject Heading</b>: | Paediatrics                                                                                                                                                                                                                                                                                                                                                                                                                                                                                                                                                                                                      |
| Secondary Subject Heading:      | General practice / Family practice                                                                                                                                                                                                                                                                                                                                                                                                                                                                                                                                                                               |
| Keywords:                       | breastfeeding, motor development, motor skills, children                                                                                                                                                                                                                                                                                                                                                                                                                                                                                                                                                         |
|                                 |                                                                                                                                                                                                                                                                                                                                                                                                                                                                                                                                                                                                                  |

SCHOLARONE™  
Manuscripts

1  
2  
3 **1 Protocol manuscript**  
4

5 2 The relationship between breastfeeding and motor development in children: a protocol  
6 3 for a systematic review and meta-analysis.  
7  
8

9  
10 **4 Authors and affiliations:**

11 5 Monserrat Hernández-Luengo<sup>1,2</sup>, Celia Álvarez-Bueno<sup>1,4</sup>, Diana P. Pozuelo-Carrascosa<sup>1</sup>,  
12 6 Carlos Berlanga-Macías<sup>1</sup>, Vicente Martínez-Vizcaíno<sup>1,3</sup>, Blanca Notario-Pacheco<sup>1</sup>  
13

14 7 <sup>1</sup>Universidad de Castilla-La Mancha, Health and Social Research Center, Cuenca, Spain  
15

16 8 <sup>2</sup>Servicio de Salud de Castilla La Mancha (SESCAM)  
17

18 9 <sup>3</sup>Universidad Autónoma de Chile, Talca, Chile  
19

20 10 <sup>4</sup>Universidad Politécnica y Artística Del Paraguay, Paraguay  
21

22  
23  
24  
25  
26 **11 \*Correspondence to:**

27 12 Celia Álvarez Bueno  
28

29 13 Author's address: C/Santa Teresa Jornet, s/n, cp: 16071, Cuenca  
30

31 14 Telephone number: + (34) 969179100 ext. 4659  
32

33 15 E-mail: [Celia.AlvarezBueno@uclm.es](mailto:Celia.AlvarezBueno@uclm.es)  
34  
35  
36  
37  
38  
39

40 **17 Word count: 2562**  
41  
42  
43  
44  
45  
46  
47  
48  
49  
50  
51  
52  
53  
54  
55  
56  
57  
58  
59  
60

1  
2  
3 **19 ABSTRACT**  
4

5 **20 Introduction:**  
6  
7

8 The recommendations of most health organizations encourage mothers to keep exclusive  
9 breastfeeding during the first 6 months and combining breastfeeding with the  
10 complementary feed at least the first and second years, due to the numerous immunologic,  
11 23 complementary feed at least the first and second years, due to the numerous immunologic,  
12 24 cognitive developmental and motor skill benefits that breastfeeding confers. Although the  
13 25 influence of breastfeeding on motor development during childhood has been studied, the  
14 26 findings are inconsistent, and some studies have even reported no effect. This manuscript  
15 27 presents a protocol for a systematic review and meta-analysis, with the aim of reviewing  
16 28 the relationship between breastfeeding and motor skill development in children; in terms  
17 29 of duration, exclusivity or non-exclusivity of breastfeeding.  
18  
19  
20  
21  
22  
23

24 **30 Methods and analysis:**  
25

26 To identify relevant studies, the search will be conducted using MEDLINE (via PubMed),  
27 32 EMBASE, Web of Science and Cochrane Library from inception to December 2019.  
28 33 Observational studies (Cross-sectional and follow up studies) written in English or  
29 34 Spanish that investigate the association between breastfeeding and motor development in  
30 35 children will be included. This systematic review and meta-analysis protocol follows the  
31 36 Preferred Reporting Items for Systematic Review and Meta-Analysis Protocols  
32 37 (PRISMA-P). A Critical Appraisal Checklist for Analytical Cross-Sectional Studies and  
33 38 The Newcastle-Ottawa Quality Assessment Scale for longitudinal studies will be used to  
34 39 assess the quality of included studies. The effect of breastfeeding on motor skill  
35 40 development will be calculated as the primary outcome. Subgroup analyses will be carried  
36 41 out based on the characteristics of motor skill development and the population included.  
37  
38  
39  
40  
41  
42  
43  
44  
45

46 **42 Ethics and dissemination**  
47

48 Ethical approval is not required because the data used for will be obtained from published  
49 44 studies and there will be no concerns about privacy. The findings from this study will be  
50 45 relevant information regarding the association of breastfeeding and motor development  
51 46 in children and could be used encourage to improve breastfeeding rates. The results will  
52 47 be published in a peer-reviewed journal.  
53  
54  
55  
56  
57

58 **48 Trial registration number:** PROSPERO CRD42018093706. (24/04/2018)

59 **49 Keywords:** breastfeeding, motor development, motor skills, children.  
60



1  
2  
3 50  
4  
5 51  
6  
7  
8 52  
9  
10 53  
11  
12 54  
13  
14 55  
15  
16 56  
17  
18 57  
19  
20 58  
21  
22 59  
23  
24 60  
25  
26 61  
27  
28 62  
29  
30 63  
31  
32 64  
33  
34 65  
35  
36 66  
37  
38 67  
39  
40 68  
41  
42 69  
43  
44 70  
45  
46 71  
47  
48 72  
49  
50 73  
51  
52 74  
53  
54 75  
55  
56 76  
57  
58  
59  
60

### **Strengths and limitations of this study**

- This review will present a comprehensive and standardised methodology, according to an established framework, to identify relevant studies that analyse the effect of breastfeeding on motor skills.
- Analysis of different sources of heterogeneity and the assessment of risk of bias of the included studies will be performed independently by two researchers.
- To identify studies that aim to determine the association between breastfeeding and motor development, an exhaustive literature search will be carried out.
- This study could be limited by the quality of available studies, insufficient methodological rigor and statistical heterogeneity.
- Different methods used for measuring breastfeeding and motor development from observational studies may be another limitation to the quality of evidence of this study.

## 77 INTRODUCTION

78 The first two years of a child's life is a critical period for health, growth and development;  
79 all of which are affected by nutritional status. It is well documented that breastfeeding  
80 provides many important health benefits to children and mothers and is considered the  
81 gold standard in infant feeding.<sup>1,2</sup>

82 The World Health Organization (WHO) recommends exclusive breastfeeding for the first  
83 6 months of life as an ideal feed, and continuation of breastfeeding for at least the first  
84 and second years, which is also supported by many health organizations.<sup>1-6</sup> However, the  
85 European Society for Paediatric Gastroenterology, Hepatology and Nutrition  
86 (ESPGHAN) differs in the recommendation of the age when complementary feed should  
87 be included because of the risk of food allergies.<sup>7</sup> The World Health Assembly, as part  
88 of its Global Strategy for the Feeding of Infants and Young Children, encouraged Member  
89 States to promote exclusive breastfeeding for 6 months as a global public health  
90 recommendation which provides many benefits to babies, reduces the risk of diseases and  
91 helps to promote good physical and cognitive growth.<sup>8,9</sup>

92 However, the rates of breastfeeding at 6 months remain low in Europe; and even in  
93 countries where initial rates are high, there is a marked decrease by the sixth month.<sup>10-11</sup>  
94 Early cessation of breastfeeding and the introduction of solids before 4 months could have  
95 considerable adverse effects on the children and women's health.<sup>12-15</sup> Therefore, it is  
96 important to elucidate what are the reasons behind the failure to achieve the  
97 recommendations, and there is a need for greater efforts to disseminate the benefits of  
98 breastfeeding and create a social environment that could favour it.

99 Although infant development is a process that is influenced by several factors,  
100 breastfeeding in the first months of life is a key determinant for optimal growth and  
101 adequate cognitive and motor development. Additionally, breastfeeding provides quality  
102 nutrients improvement (higher proportion of unsaturated fatty acids), prevents  
103 gastrointestinal infection and decreases the risk of diseases later in life such as allergies,  
104 asthma, obesity and celiac disease.<sup>2,3,7,9,12,16-19</sup>

105 Thus, motor development and cognitive function represent indicators of overall  
106 development during the first years. Motor development allows the acquisition of skills  
107 that will contribute to a child's full participation in activities, avoiding sedentary  
108 behaviours and will help to establish a direct and active relationship with the

1  
2  
3 109 environment.<sup>20,21</sup> Although consistent evidence of the positive effects of extended  
4  
5 110 breastfeeding on cognitive function has been reported,<sup>22</sup> few studies have focused on  
6  
7 111 motor development. The relationship between motor development and breastfeeding is  
8  
9 112 difficult to analyse because incomplete control for confounders is reported in the current  
10  
11 113 literature, even when various assessments of motor milestones are considered across  
12  
13 114 studies. To date, no clear associations between the duration of breastfeeding and motor  
14  
15 115 development have been reported.<sup>23-26</sup>

16 116 The purpose of this study protocol is to provide a clear methodology to review the effects  
17  
18 117 of breastfeeding practices on motor development in children, in terms of duration and  
19  
20 118 exclusive or not exclusive breastfeeding.

21  
22 119

## 23 24 120 **OBJECTIVE**

25  
26 121 The aim of this protocol study is to present an objective and transparent methodology to  
27  
28 122 conduct a systematic review and meta-analysis aimed to increase knowledge and  
29  
30 123 understanding of the associations between the duration and exclusivity of breastfeeding  
31  
32 124 and motor development in children age 0 to 10 years old.

33  
34 125

## 35 36 126 **METHODS AND ANALYSIS**

37  
38  
39 127 The methodology of this protocol was reported in accordance with the Preferred  
40  
41 128 Reporting Items for Systematic Reviews and Meta-analyses Protocols (PRISMA-P)<sup>27</sup>.  
42  
43 129 The Meta-analysis of observational studies in epidemiology: a proposal for reporting  
44  
45 130 (MOOSE<sup>28</sup>), the Preferred Reporting Items for Systematic Reviews and Meta-analyses  
46  
47 131 (PRISMA) and Cochrane Collaboration Handbook<sup>29</sup> will be used to report and guide the  
48  
49 132 review methods. This protocol was registered with PROSPERO, (Registration number  
50  
51 133 CRD42018093706) on 24 April 2018.

52  
53 134

## 54 135 **Inclusion/exclusion criteria for study selection**

55  
56 136 Studies will be retrieved from the literature by searching for studies which measure the  
57  
58 137 effects of breastfeeding duration and type (exclusivity, even if it is little, or no exclusive  
59  
60 138 breastfeeding), and report any type of measure of motor development. To be considered

1  
2  
3 139 for inclusion, studies will be required to meet the following criteria: (i) children age 0 to  
4 140 10 years old (ii) exposure, breastfeeding in terms of duration and type (exclusivity or non-  
5 141 exclusivity) and reported any type of measure; (iii) outcome, motor development  
6 142 measured using standardised tests; and (iv) studies written in English or Spanish.

7  
8  
9  
10 143 Studies will be excluded when: (i) include infants born in multiple pregnancies, with  
11 144 congenital infections or special circumstances requiring intensive care or hospitalization  
12 145 during the neonatal period; (ii) include children with mental disorders or any detected  
13 146 delay in communication, cognition or motor skills; (ii) breast milk has been  
14 147 supplemented, (iii) multiple publication derived from a single study; and (iv) do not adjust  
15 148 for confounding variates such as socioeconomic status and home environment.

16  
17  
18  
19  
20  
21 149

## 22 150 **Search methods for the identification of studies**

### 23 151 **Search strategy**

24  
25  
26  
27 152 The literature search will be conducted in MEDLINE (via PubMed), EMBASE (via  
28 153 Scopus), Web of Science and Cochrane Library from inception to December 2019.  
29 154 Searches for unpublished studies will be conducted at: OPEN GRAY, ProQuest  
30 155 dissertations & Thesis Global, Theseo, Networked digital library of theses and  
31 156 dissertations (NDLTD), and Google Scholar. A search of ClinicalTrials.gov and EudraCT  
32 157 clinical trial records will also be conducted. The searches will be reviewed immediately  
33 158 prior to the final analysis in order to identify further potential studies. Study records will  
34 159 be managed using the Mendeley reference manager.

35  
36  
37  
38  
39  
40 160 The following search terms will be combined: breastfeeding, feeding, 'exclusive  
41 161 breastfeeding', breastfed, 'breast suckling', suckling, 'motor skill', 'psychomotor  
42 162 performance', 'motor development', 'psychomotor development', 'development  
43 163 milestones', children, child, infant, childhood (Table 1). Previous reviews and meta-  
44 164 analyses will be screened, as well as the reference lists of the selected studies to complete  
45 165 the literature search.

46  
47  
48  
49  
50  
51 166

52  
53 167

54  
55 168

56  
57 169

58  
59 170

**Table 1** Search strategy for MEDLINE database

|                   |     |                     |     |           |
|-------------------|-----|---------------------|-----|-----------|
| Breastfeeding     | AND | 'motor skills'      | AND | children  |
| OR                |     | OR                  |     | OR        |
| feeding           |     | 'psychomotor        |     | child     |
| OR                |     | performance'        |     | OR        |
| 'exclusive        |     | OR                  |     | infant    |
| breastfeeding'    |     | 'motor development' |     | OR        |
| OR                |     | OR                  |     | childhood |
| breastfed         |     | 'psychomotor        |     |           |
| OR                |     | development'        |     |           |
| 'breast suckling' |     | OR                  |     |           |
| OR                |     | 'motor development  |     |           |
| 'suckling'        |     | milestones'         |     |           |

### 173 Selection of studies and data extraction

174 Two researchers will screen all relevant titles and abstracts of the retrieved publications  
 175 to identify eligible studies. Inclusion and exclusion criteria will be applied to full texts to  
 176 identify all potentially eligible articles. Inconsistencies in data collection will be solved  
 177 by consensus. A third reviewer will be consulted when disagreements persist. The process  
 178 of identifying, screening and including/excluding articles will be illustrated using the  
 179 PRISMA<sup>27</sup> flow chart (Figure 1).

180 Finally, information about the main characteristics of the identified studies will be  
 181 extracted, including the following data: i) first author's name, ii) publication year, iii)  
 182 country, iv) study design, v) characteristics of the study population (sample size, age of  
 183 children at evaluation, gender and number of participants in each group), vi) breastfeeding  
 184 category (as defined in Table 2) and vii) test used for assessment of motor development,  
 185 vii (Table 2). The authors of the included studies will be contacted to request any missing  
 186 data.

**Table 2** Characteristics of studies included in the systematic review and/or meta-analysis

| Reference                                   | Country | Study design        | Population             |                             | Breastfeeding                                                  |                                                    | Outcome MD                    |                 |
|---------------------------------------------|---------|---------------------|------------------------|-----------------------------|----------------------------------------------------------------|----------------------------------------------------|-------------------------------|-----------------|
|                                             |         |                     | Sample size            | Sample age                  | Categories                                                     | n                                                  | Tool                          | Measurement     |
| First author's name and year of publication | Country | Design of the study | Number of participants | Age of participants (years) | Duration periods of exclusive breastfeeding /any breastfeeding | Number participants in each breastfeeding category | Instrument used to measure MD | Mean value (SD) |

189 Key: MD, Motor Development; SD: Standard Deviation

190

191 **Assessment of risk of bias**

192 Two independent researchers will be blinded to the authors, titles and years of publication  
 193 of the included studies to evaluate the risk of bias of each included study. The Critical  
 194 Appraisal Checklist for Analytical Cross-Sectional Studies from The Joanna Briggs  
 195 Institute will be used.<sup>30</sup> This tool evaluates the risk of bias according to eight items that  
 196 could be scored as “Yes”, “No”, “Unclear” or “Not applicable”.

197 The Newcastle-Ottawa Quality Assessment Scale<sup>31</sup> will be used to assess the risk of bias  
 198 of longitudinal studies, including case control and cohort studies. This tool evaluates the  
 199 risk of bias according to eight items which could be grouped in three categories: selection,  
 200 comparability and exposure or outcome (for case control or cohort studies, respectively).  
 201 Each study can be awarded one star for each item within the selection and exposure  
 202 categories, and a maximum of two stars in the comparability category.

203 Any disagreements over the assessment of quality will be solved by consensus. A third  
 204 researcher will be consulted if a consensus is not reached.

205

206 **Statistical analysis**

207 After data extraction, the reviewers will determine whether meta-analysis is possible. At  
 208 least four studies addressing the association between breastfeeding and motor  
 209 development will be required in order to conduct the meta-analysis. If meta-analysis is  
 210 possible, STATA V.15 software will be used. The standardized mean difference will be

1  
2  
3 211 calculated for each study reporting the association between breastfeeding category and  
4  
5 212 motor development using Cohen's d index.<sup>32</sup> To compute the pooled effect size (ES)  
6  
7 213 estimates with 95% confidence intervals (CIs) fixed-effects models<sup>33</sup> will be used in the  
8  
9 214 case of no heterogeneity; otherwise, random-effects model<sup>34,35</sup> will be used We will  
10  
11 215 compare the level of motor development in children who have been exclusively breastfed  
12  
13 216 or breastfed for any length of time, as a reference group, with the motor development of  
14  
15 217 those who have never been breastfed. If possible, a comparison between children  
16  
17 218 breastfed for at least 6 months and children breastfed for less than 6 months will also be  
18  
19 219 carried out.

20  
21 220 Heterogeneity will be assessed by computing the I<sup>2</sup> statistic.<sup>36</sup> The values of I<sup>2</sup> will be  
22  
23 221 considered as follows: 0%–40% might not be important, 30%–60% may represent  
24  
25 222 moderate heterogeneity, 50%–90% may represent substantial heterogeneity and 75%–  
26  
27 223 100% represents considerable heterogeneity.

28  
29 224 Linear meta-analysis regression models will be used to explore whether covariates could  
30  
31 225 be associated with the magnitude of the effect and could explain the observed statistical  
32  
33 226 heterogeneity.<sup>36</sup> Finally, publication bias will be evaluated using a funnel plot according  
34  
35 227 to the method proposed by Egger.<sup>37</sup> When a meta-analysis is not feasible, we will perform  
36  
37 228 a narrative synthesis.

38  
39 229

### 230 *Subgroup analysis and meta-regression*

40  
41 231 If enough studies are available, subgroup analysis will be conducted. Several meta-  
42  
43 232 regressions will be performed on study and sample characteristics including the type of  
44  
45 233 motor development assessment (i.e., gross or fine motor), gender, age of study  
46  
47 234 participants, birth weight, breastfeeding classification (never, less than 6 months or more  
48  
49 235 than 6 months) and aspects related to motor . Furthermore, the design and risk of bias  
50  
51 236 scores of the studies will be considered for additional subgroup analysis. Additional  
52  
53 237 potential moderating variables may be identified after reviewing the literature.

54  
55 238

### 239 *Sensitivity analysis*

56  
57 240 We will perform sensitivity analysis by removing studies one by one from the main  
58  
59 241 analysis to assess the robustness of the findings.

## 242 **No patient and Public Involvement**

243 Existing databases will be used for the purpose of this study. Patients and public will not  
244 be involved in the design of this study. This review will assess the effect of breastfeeding  
245 on motor developmental outcomes in infants. Insights provided by this study could be  
246 used in clinical practice to ameliorate outcomes; specifically, motor development; of  
247 children in the population.

## 249 **DISCUSSION**

250 The aim of this study is to present an objective and transparent methodology to conduct  
251 a systematic review and meta-analysis investigating whether the duration of  
252 breastfeeding is associated with motor development.

253 Many studies have examined whether breastfeeding in early life, a critical phase of  
254 development, could affect later cognitive function and motor development in  
255 children.<sup>20-22</sup> Infant development is a complex process, which encompasses several  
256 factors allowing the acquisition of skills that will contribute to the child's full  
257 participation in activities and help to establish a direct relationship with the  
258 environment.<sup>20</sup>

259 Motor function is an accepted indicator of development during the first years of life.<sup>38-40</sup>  
260 It directly contributes to and reflects the relationship that the child establishes with the  
261 physical and social environments. In addition, motor development plays an important role  
262 in other areas of development, such as physical growth and cardiorespiratory fitness, the  
263 latter being a powerful and effective indicator of cardiovascular health.<sup>41-43</sup> Poor motor  
264 development performance may incline children towards activity avoidance and sedentary  
265 behaviours, which are linked to increased risk of chronic disease in adulthood.<sup>44</sup>

266 There is considerable evidence about the long- and short-term benefits of breastfeeding  
267 for infant health.<sup>16-19</sup> However, no consensus has been reached about the effects of  
268 breastfeeding on motor development, and the results and conclusions of existing studies  
269 are controversial.<sup>21,25,26</sup> The complexity of child development makes it difficult to  
270 evaluate these effects, and certain aspects of infant development are influenced by  
271 psychosocial and socioeconomic factors, which could contribute to some of the observed  
272 differences. The scientific evidence regarding the benefits of breastfeeding in terms of



1  
2  
3 273 motor development outcomes is weak, and the strength of this association is controversial  
4  
5 274 because most studies lack adequate control for potential confounders. Furthermore,  
6  
7 275 previous studies have measured infant development using different standardised tests.

8  
9 276 Potential limitations of this research could include publication bias, information bias,  
10  
11 277 inclusion of articles in English and Spanish only, analysis of cross-sectional studies as  
12  
13 278 this does not allow a causal association to be evaluated (breastfeeding always precedes  
14  
15 279 motor development), poor statistical analysis and inadequate reporting of methods and  
16  
17 280 findings of the primary studies. To overcome these limitations, the systematic review and  
18  
19 281 meta-analysis will be conducted and reported by two independent reviewers and a third  
20  
21 282 researcher will be consulted if inconsistencies exist in data collection or consensus is not  
22  
23 283 reached. However, despite these strategies, is not possible to ensure the lack of risk of  
24  
25 284 bias. Furthermore; existing guidelines, the MOOSE statement, PRISMA, and Cochrane  
26  
27 285 Collaboration Handbook recommendations will be followed.

28  
29 286 To summarise, we will carry out a systematic review and meta-analysis with the objective  
30  
31 287 of reviewing existing literature on the relationship between breastfeeding and motor  
32  
33 288 development. Despite the fact that some aspects of motor development appear to be  
34  
35 289 controversial, if this study confirms the positive effects of breastfeeding on motor skills  
36  
37 290 development, it could encourage greater interest in breastfeeding within the areas of  
38  
39 291 public and child health.

40  
41 292 The lack of evidence on the effect of breastfeeding and motor skills development  
42  
43 293 highlights the need for guidelines or recommendations based on rigorous and updated  
44  
45 294 reviews summarizing the available scientific evidence, to be used in daily practice in  
46  
47 295 order to improve the quality and effectiveness of interventions. The findings of this  
48  
49 296 review could lead to an improvement in the health status and development of children  
50  
51 297 worldwide.

52  
53 298

## 54 299 **ETHICS AND DISSEMINATION**

55  
56 300 The data included in this project will be provide by the original studies; therefore, ethical  
57  
58 301 approval and informed consent of patients will not be required.

59  
60 302 This protocol provides a clear and structured procedure to extract relevant information on  
303 the association of breastfeeding and motor skills. This study will have clinical and public

1  
2  
3 304 health implications, because it could provide support for recommendations on  
4  
5 305 breastfeeding, which might help to prevent low rates of breastfeeding and early  
6  
7 306 abandonment. Suggestions for future research will be made according to the findings of  
8  
9 307 this systematic review and meta-analysis, and evidence-based recommendations to  
10  
11 308 improve breastfeeding rates will be offered. Moreover, longitudinal studies will be  
12  
13 309 needed to confirm the duration effect of breastfeeding better associate with children's  
14  
15 310 motor development.

16 311

17  
18 312 **Contributors:**

19  
20 313 BN-P and MH-L designed the study. BN-P was the principal investigator and guarantor.  
21  
22 314 BN-P and MH-L were the main coordinators of the study. DPP-C, CA-B, CB-C, VM-V  
23  
24 315 and BN-P conducted the study. MH-L, DPP-C and VM-V gave statistical and  
25  
26 316 epidemiological support. MH-L wrote the article with the support of CB-C, VM-V and  
27  
28 317 BN-P. All authors reviewed and approved the final version of the manuscript.

29  
30 318 **Competing interests:**

31  
32 319 All authors have completed the ICMJE uniform disclosure form at  
33  
34 320 [www.icmje.org/coi\\_disclosure.pdf](http://www.icmje.org/coi_disclosure.pdf) and declare: no support from any organisation for the  
35  
36 321 submitted work; no financial relationships with any organisations that might have an  
37  
38 322 interest in the submitted work in the previous three years; no other relationships or  
39  
40 323 activities that could appear to have influenced the submitted work.

41 324 **Funding statement:**

42  
43 325 This work was not supported by any external grants or funding.

44  
45 326 **Data sharing:**

46  
47 327 Extra data is available by emailing: [celia.alvarezbuena@uclm.es](mailto:celia.alvarezbuena@uclm.es)

48  
49 328 **Transparency**

50  
51 329 The manuscripts guarantor (BN-P) affirms that the manuscript is an honest, accurate, and  
52  
53 330 transparent account of the study being reported; that no important aspects of the study  
54  
55 331 have been omitted; and that any discrepancies from the study as planned have been  
56  
57 332 explained.  
58  
59  
60

333 **REFERENCES**

- 334 1. World Health Organization/UNICEF. *Global Strategy for Infant and Young Child*  
335 *Feeding*. Geneva: WHO, 2003.
- 336 2. Kramer MS, Kaluma R. Optimal duration of exclusive breastfeeding. *Cochrane*  
337 *Database of Syst Rev*. 2012;8:CD003517.
- 338 3. World Health Organization. *Infant and young child feeding*. Geneva: WHO 2017.
- 339 4. Organización Panamericana de la Salud. *Principios de Orientación para la*  
340 *Alimentación complementaria del niño amamantado*. Washington DC: PAHO,  
341 2003.
- 342 5. Kleinman RE, Greer FR. American Academy of Pediatrics Committee on  
343 Nutrition. Complementary feeding. *Pediatric Nutrition*. 7th ed. Elk Grove Village,  
344 IL: American Academy of Pediatrics; 2014. p. 123.
- 345 6. Infant Feeding Guidelines. From birth to 12 months. 2015. [www.gov.wales](http://www.gov.wales).  
346 Accessed 28 May 2018.
- 347 7. Fewtrell M, Bronsky J, Campoy C, Domellöf M, Embleton N, Fidler Mis N, et al.  
348 Complementary feeding: A position Paper by the European Society for Paediatric  
349 Gastroenterology, Hepatology, and Nutrition (ESPGHAN) Committee on  
350 nutrition. *J Pediatr Gastroenterol Nutr*. 2017;64:119–132.
- 351 8. World Health Organization. *65ª Asamblea Mundial de la Salud. Plan de*  
352 *aplicación integral sobre nutrición materna, del lactante y del niño pequeño*.  
353 OMS; 2012.
- 354 9. Vestergaard M, Obel C, Henriksen TB, Sorensen HT, Skajaa, E, Ostergaard J.  
355 Duration of breastfeeding and developmental milestones during the latter half of  
356 infancy. *Acta Paediatr*. 1999;88:1327–1332.
- 357 10. Comité de Lactancia Materna de la Asociación Española de Pediatría. *Lactancia*  
358 *Materna en cifras: Tasas de inicio y duración de la Lactancia Materna en España*  
359 *y otros países*. 2016
- 360 11. Rius JM, Ortuño J, Rivas C, Maravall M, Calzado MA, López A, et al. Factores  
361 asociados al abandono precoz de la lactancia materna en una región del este de  
362 España. *An Pediatr (Barc)*. 2014;80:6–15.
- 363 12. Smith HA, Becker GE. Early additional food and fluids for healthy breastfed full-  
364 term infants. *Cochrane Database Syst Rev*. 2016;8:CD006462.

- 1  
2  
3 365 13. Chowdhury R, Sinha B, Sankar MJ, Taneja S, Bhandari N, Bahl R, et al.  
4  
5 366 Breastfeeding and maternal health outcomes: a systematic review and meta-  
6  
7 367 analysis. *Acta Paediatr Suppl.* 2015;104:96–113.
- 8  
9 368 14. European Food Safety Authority. Panel on Dietetic Products NAD: Scientific  
10  
11 369 opinion on the appropriate age for introduction of complementary feeding of  
12  
13 370 infants. *Eur Food Safet Authority J.* 2009;7:1423.
- 14  
15 371 15. Quasen W, Fenton TR, Friel JK. Age of introduction of first complementary  
16  
17 372 feeding for infants: a systematic review. *BMC Pediatr.* 2015:107.
- 18  
19 373 16. Horta BL, Victoria CG. Short-term effects of breastfeeding a systematic review  
20  
21 374 of benefits of breastfeeding on diarrhoea and pneumonia mortality. Geneva:  
22  
23 375 World Health Organization; 2013.
- 24  
25 376 17. Horta BL, Victoria CG. Long-term effects of breastfeeding: a systematic review.  
26  
27 377 Geneva: World Health Organization; 2013.
- 28  
29 378 18. Umer A, Hamilton C, Edwards RA, et al. Association Between Breastfeeding and  
30  
31 379 Childhood Cardiovascular Disease Risk Factors. *Matern Child Health J*  
32  
33 380 2019;23:228–39. doi:10.1007/s10995-018-2641-8.
- 34  
35 381 19. Horta BL, de Lima NP. Breastfeeding and Type 2 Diabetes: Systematic Review  
36  
37 382 and Meta-Analysis. *Curr Diab Rep* 2019;19:1. doi:10.1007/s11892-019-1121-x.
- 38  
39 383 20. Pollitt E, Caycho T. Desarrollo motor como indicador del desarrollo infantil  
40  
41 384 durante los primeros dos años de vida. *Revista de Psicología:* 2010;28:381–409.  
42  
43 385 Available at: <http://www.redalyc.org/articulo.oa?id=337829515007>> ISSN 0254-  
44  
45 386 9247. Accessed on 26 August 2018.
- 46  
47 387 21. Michels KA, Ghassabian A, Mumford SL, Sundaram R, Bell EM, Bello SC, et al.  
48  
49 388 Breastfeeding and motor development in term and preterm infants in a  
50  
51 389 longitudinal US cohort. *Am J Clin Nutr.* 2017;106(6):1456–1462.
- 52  
53 390 22. Anderson JW, Johnstone BM, Remley DT. Breast-feeding and cognitive  
54  
55 391 development: a meta-analysis. *Am J Clin Nutr.* 1999;70:525–535.
- 56  
57 392 23. Thorsdottir I, Gunnarsdottir I, Kvaran MA, Gretarsson SJ. Maternal body mass  
58  
59 393 index, duration of exclusive breastfeeding and children's developmental status at  
60  
394 the age of 6 years. *Eur J Clin Nutr.* 2005 Mar;59(3):426–431.
- 395  
396 24. Chiu WC, Liao HF, Chang PJ, Chen PC, Chen YC. Duration of breast feeding and  
397  
398 risk of developmental delay in Taiwanese children: a nationwide birth cohort  
399  
400 399 study. *Paediatr Perinat Epidemiol.* 2011;25:519–527

- 1  
2  
3 398 25. Sacker A, Quigley MA, Kelly YJ. Breastfeeding and developmental delay:  
4 399 findings from the millennium cohort study. *Pediatrics*. 2006;118:e682–e689.  
5  
6 400 26. Dee DL, Li R, Lee LC, Grummer-Strawn LM. Associations between  
7 401 breastfeeding practices and young children’s language and motor skill  
8 402 development. *Pediatrics*. 2007;119(Suppl. 1):S92–S98.  
9  
10 403 27. Moher D, Shamseer L, Clarke M, Ghersi D, Liberati A, Petticreque M, et al.  
11 404 Preferred reporting items for systematic review and meta-analysis protocols  
12 405 (PRISMA-P) 2015 statement. *Syst Rev*. 2015;4:1.  
13  
14 406 28. Stroup DF, Berlin JA, Morton SC, et al. Meta-analysis of observational studies in  
15 407 epidemiology: a proposal for reporting. *Meta-analysis Of Observational Studies*  
16 408 *in Epidemiology (MOOSE) group*. *JAMA* 2000;283:2008–2012.  
17  
18 409 29. Higgins JPT, Green S. *Cochrane Handbook for Systematic Reviews of*  
19 410 *Interventions*. John Wiley & Sons 2011.  
20  
21 411 30. Moola S, Munn Z, Tufanaru C, Aromataris E, Sears K, Sfetcu R, et al. Chapter 7:  
22 412 Systematic reviews of etiology and risk. In: Aromataris E, Munn Z, editors.  
23 413 *Joanna Briggs Institute Reviewer’s Manual*. The Joanna Briggs Institute, 2017.  
24 414 Available from <https://reviewersmanual.joannabriggs.org/>.  
25  
26 415 31. Wells GA, Shea B, O’Connell D, Peterson J, Welch V, Losos M, et al. *The*  
27 416 *Newcastle-Ottawa Scale (NOS) for Assessing the Quality of Nonrandomised*  
28 417 *Studies in Metaanalyses*. Ottawa: Ottawa Hospital Research Institute. Available  
29 418 from: [http://www.ohri.ca/programs/clinical\\_epidemiology/oxford.asp](http://www.ohri.ca/programs/clinical_epidemiology/oxford.asp). Accessed  
30 419 31 May 2018.  
31  
32 420 32. Lipsey M, Wilson D. *Practical meta-analysis*. Thousand Oaks, CA: Sage  
33 421 Publications, 2001.  
34  
35 422 33. Leonard T, Duffy JC. A Bayesian fixed effects analysis of the Mantel-Haenszel  
36 423 model applied to meta-analysis. *Stat Med*. 2002;21:2295–2312.  
37  
38 424 34. DerSimonian R, Kacker R. Random-effects model for meta-analysis of clinical  
39 425 trials: An update. *Contemp Clin Trials*. 2007;28:105–114.  
40  
41 426 35. Borenstein M, Hedges L V., Higgins JPT, et al. A basic introduction to fixed-  
42 427 effect and random-effects models for meta-analysis. *Res Synth Methods*  
43 428 2010;1:97–111. doi:10.1002/jrsm.12  
44  
45 429 36. Higgins JPT, Thompson SG. Quantifying heterogeneity in a meta-analysis. *Stat*  
46 430 *Med*. 2002;21:1539–1558.

- 1  
2  
3 431 37. Sterne JA, Egger M, Smith GD. Systematic reviews in health care: Investigating  
4 432 and dealing with publication and other biases in meta-analysis. *BMJ*. 2001; 323:  
5 433 101–5.  
6  
7  
8 434 38. Rigby M, Köhler L, Mitch E. Blair, Metchler R. Child health indicators for  
9 435 Europe: a priority for a caring society. *Eur J Public Health*. 2003;13(3 Suppl):38–  
10 436 46.  
11  
12 437 39. Köhler L, Rigby M. Indicators of children's development: considerations when  
13 438 constructing a set of national Child Health Indicators for the European Union.  
14 439 *Child Care Health Dev*. 2003;29:551–558.  
15  
16 440 40. The WHO Multicentre Growth Reference Study (MGRS): Rationale, planning,  
17 441 and implementation. Available from  
18 442 <http://www.who.int/childgrowth/mgrs/fnu/en/index.html>. Accessed 15 June  
19 443 2018.  
20  
21 444 41. Artero EG, Ortega FB, España-Romero V, Labayen I, Huybrechts I, Papadaki A,  
22 445 et al. Longer breastfeeding is associated with increased lower body explosive  
23 446 strength during adolescence. *J Nutr*. 2010;140:1989–1995.  
24  
25 447 42. Ortega F, Ruiz J, Castillo M, Sjöström M. Physical fitness in childhood and  
26 448 adolescence: a powerful marker of health. *Int J Obes (Lond)*. 2008;32:1–11.  
27  
28 449 43. Kodama S, Saito K, Tanaka S, Maki M, Yachi Y, Asumi M, et al.  
29 450 Cardiorespiratory fitness as a quantitative predictor of all-cause mortality and  
30 451 cardiovascular events in healthy men and women. *JAMA* 2009;301:2024–2035  
31  
32 452 44. Lucas BR, Elliott EJ, Coggan S, Pinto RZ, Jinkowic T, McCoy SW, et al.  
33 453 Interventions to improve gross motor performance in children with  
34 454 neurodevelopmental disorders: a meta-analysis. *BMC Pediatr*. 2016;16:193.  
35  
36  
37  
38  
39  
40  
41  
42  
43  
44  
45  
46

## 456 TABLES LEGENDS

457 **Table 1.** Search strategy for the MEDILINE database.

458 **Table 2.** Characteristics of studies included in the systematic review and/or meta-  
459 analysis.

## 460 FIGURE LEGENDS

461 **Figure 1.** PRISMA (Preferred Reporting Items for Systematic Review and Meta-  
462 Analysis) flow diagram of identification, screening, eligibility and inclusion of studies

1  
2  
3  
4  
5  
6  
7  
8  
9  
10  
11  
12  
13  
14  
15  
16  
17  
18  
19  
20  
21  
22  
23  
24  
25  
26  
27  
28  
29  
30  
31  
32  
33  
34  
35  
36  
37  
38  
39  
40  
41  
42  
43  
44  
45  
46  
47  
48  
49  
50  
51  
52  
53  
54  
55  
56  
57  
58  
59  
60

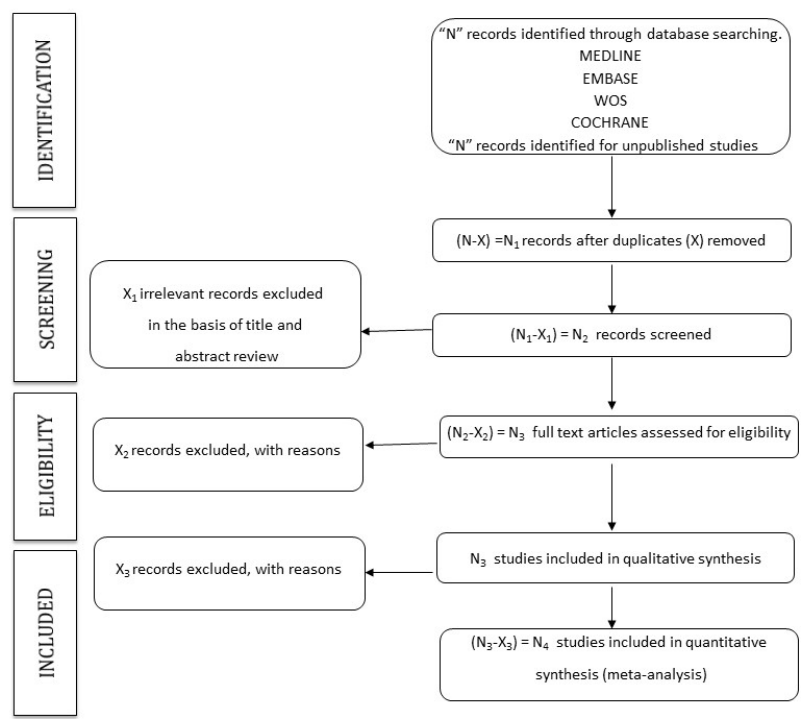

254x190mm (96 x 96 DPI)

**PRISMA-P (Preferred Reporting Items for Systematic review and Meta-Analysis Protocols) 2015 checklist: recommended items to address in a systematic review protocol\***

| Section and topic                 | Item No | Checklist item                                                                                                                                                                                                                |
|-----------------------------------|---------|-------------------------------------------------------------------------------------------------------------------------------------------------------------------------------------------------------------------------------|
| <b>ADMINISTRATIVE INFORMATION</b> |         |                                                                                                                                                                                                                               |
| Title:                            |         |                                                                                                                                                                                                                               |
| Identification: p. 1              | 1a      | Identify the report as a protocol of a systematic review                                                                                                                                                                      |
| Update: NA                        | 1b      | If the protocol is for an update of a previous systematic review, identify as such                                                                                                                                            |
| Registration: p. 2                | 2       | If registered, provide the name of the registry (such as PROSPERO) and registration number                                                                                                                                    |
| Authors: pp. 1, 13                |         |                                                                                                                                                                                                                               |
| Contact: p. 1                     | 3a      | Provide name, institutional affiliation, e-mail address of all protocol authors; provide physical mailing address of corresponding author                                                                                     |
| Contributions: p. 13              | 3b      | Describe contributions of protocol authors and identify the guarantor of the review                                                                                                                                           |
| Amendments: NA                    | 4       | If the protocol represents an amendment of a previously completed or published protocol, identify as such and list changes; otherwise, state plan for documenting important protocol amendments                               |
| Support: NA                       |         |                                                                                                                                                                                                                               |
| Sources                           | 5a      | Indicate sources of financial or other support for the review                                                                                                                                                                 |
| Sponsor                           | 5b      | Provide name for the review funder and/or sponsor                                                                                                                                                                             |
| Role of sponsor or funder         | 5c      | Describe roles of funder(s), sponsor(s), and/or institution(s), if any, in developing the protocol                                                                                                                            |
| <b>INTRODUCTION</b>               |         |                                                                                                                                                                                                                               |
| Rationale: pp 4, 5                | 6       | Describe the rationale for the review in the context of what is already known                                                                                                                                                 |
| Objectives p. 5                   | 7       | Provide an explicit statement of the question(s) the review will address with reference to participants, interventions, comparators, and outcomes (PICO)                                                                      |
| <b>METHODS</b>                    |         |                                                                                                                                                                                                                               |
| Eligibility criteria: pp. 5, 6    | 8       | Specify the study characteristics (such as PICO, study design, setting, time frame) and report characteristics (such as years considered, language, publication status) to be used as criteria for eligibility for the review |
| Information sources: p. 6         | 9       | Describe all intended information sources (such as electronic databases, contact with study authors, trial registers or other grey literature sources) with planned dates of coverage                                         |
| Search strategy: pp. 6, 7         | 10      | Present draft of search strategy to be used for at least one electronic database, including planned limits, such that it could be repeated                                                                                    |
| Study records: pp. 7, 8           |         |                                                                                                                                                                                                                               |
| Data management: p. 7             | 11a     | Describe the mechanism(s) that will be used to manage records and data throughout the review                                                                                                                                  |



1  
2  
3  
4  
5  
6  
7  
8  
9  
10  
11  
12  
13  
14  
15  
16  
17  
18  
19  
20  
21  
22  
23  
24  
25  
26  
27  
28  
29  
30  
31  
32  
33  
34  
35  
36  
37  
38  
39  
40  
41  
42  
43  
44  
45  
46

|                                          |     |                                                                                                                                                                                                                                                     |
|------------------------------------------|-----|-----------------------------------------------------------------------------------------------------------------------------------------------------------------------------------------------------------------------------------------------------|
| Selection process: p. 7                  | 11b | State the process that will be used for selecting studies (such as two independent reviewers) through each phase of the review (that is, screening, eligibility and inclusion in meta-analysis)                                                     |
| Data collection process: p. 7            | 11c | Describe planned method of extracting data from reports (such as piloting forms, done independently, in duplicate), any processes for obtaining and confirming data from investigators                                                              |
| Data items: pp 7, 10                     | 12  | List and define all variables for which data will be sought (such as PICO items, funding sources), any pre-planned data assumptions and simplifications                                                                                             |
| Outcomes and prioritization: pp. 7, 8    | 13  | List and define all outcomes for which data will be sought, including prioritization of main and additional outcomes, with rationale                                                                                                                |
| Risk of bias in individual studies: p. 8 | 14  | Describe anticipated methods for assessing risk of bias of individual studies, including whether this will be done at the outcome or study level, or both; state how this information will be used in data synthesis                                |
| Data synthesis: pp 9, 10                 | 15a | Describe criteria under which study data will be quantitatively synthesised                                                                                                                                                                         |
|                                          | 15b | If data are appropriate for quantitative synthesis, describe planned summary measures, methods of handling data and methods of combining data from studies, including any planned exploration of consistency (such as I <sup>2</sup> , Kendall's τ) |
|                                          | 15c | Describe any proposed additional analyses (such as sensitivity or subgroup analyses, meta-regression)                                                                                                                                               |
|                                          | 15d | If quantitative synthesis is not appropriate, describe the type of summary planned                                                                                                                                                                  |
| Meta-bias(es): NA                        | 16  | Specify any planned assessment of meta-bias(es) (such as publication bias across studies, selective reporting within studies)                                                                                                                       |
| Confidence in cumulative evidence: NA    | 17  | Describe how the strength of the body of evidence will be assessed (such as GRADE)                                                                                                                                                                  |

**\* It is strongly recommended that this checklist be read in conjunction with the PRISMA-P Explanation and Elaboration (cite when available) for important clarification on the items. Amendments to a review protocol should be tracked and dated. The copyright for PRISMA-P (including checklist) is held by the PRISMA-P Group and is distributed under a Creative Commons Attribution Licence 4.0.**

*From: Shamseer L, Moher D, Clarke M, Ghersi D, Liberati A, Petticrew M, Shekelle P, Stewart L, PRISMA-P Group. Preferred reporting items for systematic review and meta-analysis protocols (PRISMA-P) 2015: elaboration and explanation. BMJ. 2015 Jan 2;349(jan02 1):g7647.*

# BMJ Open

## The relationship between breastfeeding and motor development in children: a protocol for a systematic review and meta-analysis.

|                                 |                                                                                                                                                                                                                                                                                                                                                                                                                                                                                                                                                                                                                  |
|---------------------------------|------------------------------------------------------------------------------------------------------------------------------------------------------------------------------------------------------------------------------------------------------------------------------------------------------------------------------------------------------------------------------------------------------------------------------------------------------------------------------------------------------------------------------------------------------------------------------------------------------------------|
| Journal:                        | <i>BMJ Open</i>                                                                                                                                                                                                                                                                                                                                                                                                                                                                                                                                                                                                  |
| Manuscript ID                   | bmjopen-2019-029063.R2                                                                                                                                                                                                                                                                                                                                                                                                                                                                                                                                                                                           |
| Article Type:                   | Protocol                                                                                                                                                                                                                                                                                                                                                                                                                                                                                                                                                                                                         |
| Date Submitted by the Author:   | 05-Aug-2019                                                                                                                                                                                                                                                                                                                                                                                                                                                                                                                                                                                                      |
| Complete List of Authors:       | Hernández Luengo, Monserrat; Universidad de Castilla-La Mancha, Social and Health Care Research Center<br>Álvarez-Bueno, Celia; Universidad de Castilla-La Mancha, Social and Health Care Research Center<br>Pozuelo-Carrascosa, Diana P; Universidad de Castilla-La Mancha, Social and Health Care Research Center<br>Berlanga-Macías, Carlos; Universidad de Castilla-La Mancha, Social and Health Care Research Center<br>Martinez-Vizcaino, Vicente; Universidad de Castilla-La Mancha, Centro de Estudios Sociosanitarios<br>Notario-Pacheco, Blanca; Universidad de Castilla-La Mancha, Faculty of Nursing |
| <b>Primary Subject Heading</b>: | Paediatrics                                                                                                                                                                                                                                                                                                                                                                                                                                                                                                                                                                                                      |
| Secondary Subject Heading:      | General practice / Family practice                                                                                                                                                                                                                                                                                                                                                                                                                                                                                                                                                                               |
| Keywords:                       | breastfeeding, motor development, motor skills, children                                                                                                                                                                                                                                                                                                                                                                                                                                                                                                                                                         |
|                                 |                                                                                                                                                                                                                                                                                                                                                                                                                                                                                                                                                                                                                  |

SCHOLARONE™  
Manuscripts

1  
2  
3 **1 Protocol manuscript**  
4

5 2 The relationship between breastfeeding and motor development in children: a protocol  
6 3 for a systematic review and meta-analysis.  
7  
8

9  
10 **4 Authors and affiliations:**

11 5 Monserrat Hernández-Luengo<sup>1,2</sup>, Celia Álvarez-Bueno<sup>1,4</sup>, Diana P. Pozuelo-Carrascosa<sup>1</sup>,  
12 6 Carlos Berlanga-Macías<sup>1</sup>, Vicente Martínez-Vizcaíno<sup>1,3</sup>, Blanca Notario-Pacheco<sup>1</sup>  
13

14 7 <sup>1</sup>Universidad de Castilla-La Mancha, Health and Social Research Center, Cuenca, Spain  
15

16 8 <sup>2</sup>Servicio de Salud de Castilla La Mancha (SESCAM)  
17

18 9 <sup>3</sup>Universidad Autónoma de Chile, Talca, Chile  
19

20 10 <sup>4</sup>Universidad Politécnica y Artística Del Paraguay, Paraguay  
21

22  
23  
24  
25  
26 **11 \*Correspondence to:**

27 12 Celia Álvarez Bueno  
28

29 13 Author's address: C/Santa Teresa Jornet, s/n, cp: 16071, Cuenca  
30

31 14 Telephone number: + (34) 969179100 ext. 4659  
32

33 15 E-mail: [Celia.AlvarezBueno@uclm.es](mailto:Celia.AlvarezBueno@uclm.es)  
34  
35  
36  
37  
38  
39

40 **17 Word count: 2562**  
41  
42  
43  
44  
45  
46  
47  
48  
49  
50  
51  
52  
53  
54  
55  
56  
57  
58  
59  
60

1  
2  
3 19 **ABSTRACT**  
4

5 20 **Introduction:**  
6  
7

8 21 The recommendations of most health organizations encourage mothers to keep exclusive  
9 22 breastfeeding during the first 6 months and combining breastfeeding with the  
10 23 complementary feed at least the first and second years, due to the numerous immunologic,  
11 24 cognitive developmental and motor skill benefits that breastfeeding confers. Although the  
12 25 influence of breastfeeding on motor development during childhood has been studied, the  
13 26 findings are inconsistent, and some studies have even reported no effect. This manuscript  
14 27 presents a protocol for a systematic review and meta-analysis, with the aim of reviewing  
15 28 the relationship between breastfeeding and motor skill development in children; in terms  
16 29 of duration, exclusivity or non-exclusivity of breastfeeding.  
17  
18  
19  
20  
21  
22  
23

24 30 **Methods and analysis:**  
25

26 31 To identify relevant studies, the search will be conducted using MEDLINE (via PubMed),  
27 32 EMBASE, Web of Science and Cochrane Library from inception to December 2019.  
28 33 Observational studies (Cross-sectional and follow up studies) written in English or  
29 34 Spanish that investigate the association between breastfeeding and motor development in  
30 35 children will be included. This systematic review and meta-analysis protocol follows the  
31 36 Preferred Reporting Items for Systematic Review and Meta-Analysis Protocols  
32 37 (PRISMA-P). A Critical Appraisal Checklist for Analytical Cross-Sectional Studies and  
33 38 The Newcastle-Ottawa Quality Assessment Scale for longitudinal studies will be used to  
34 39 assess the quality of included studies. The effect of breastfeeding on motor skill  
35 40 development will be calculated as the primary outcome. Subgroup analyses will be carried  
36 41 out based on the characteristics of motor skill development and the population included.  
37  
38  
39  
40  
41  
42  
43  
44  
45

46 42 **Ethics and dissemination**  
47

48 43 Ethical approval is not required because the data used for will be obtained from published  
49 44 studies and there will be no concerns about privacy. The findings from this study will be  
50 45 relevant information regarding the association of breastfeeding and motor development  
51 46 in children and could be used encourage to improve breastfeeding rates. The results will  
52 47 be published in a peer-reviewed journal.  
53  
54  
55  
56  
57

58 48 **Trial registration number:** PROSPERO CRD42018093706. (24/04/2018)

59 49 **Keywords:** breastfeeding, motor development, motor skills, children.  
60

1  
2  
3 50  
4  
5 51  
6  
7  
8 52  
9  
10 53  
11  
12 54  
13  
14 55  
15  
16 56  
17  
18 57  
19  
20 58  
21  
22 59  
23  
24 60  
25  
26 61  
27  
28 62  
29  
30 63  
31  
32 64  
33  
34 65  
35  
36 66  
37  
38 67  
39  
40 68  
41  
42 69  
43  
44 70  
45  
46 71  
47  
48 72  
49  
50 73  
51  
52 74  
53  
54 75  
55  
56 76  
57  
58  
59  
60

### **Strengths and limitations of this study**

- This review will present a comprehensive and standardised methodology, according to an established framework, to identify relevant studies that analyse the effect of breastfeeding on motor skills.
- Analysis of different sources of heterogeneity and the assessment of risk of bias of the included studies will be performed independently by two researchers.
- To identify studies that aim to determine the association between breastfeeding and motor development, an exhaustive literature search will be carried out.
- This study could be limited by the quality of available studies, insufficient methodological rigor and statistical heterogeneity.
- Different methods used for measuring breastfeeding and motor development from observational studies may be another limitation to the quality of evidence of this study.

## 77 INTRODUCTION

78 The first two years of a child's life is a critical period for health, growth and development;  
79 all of which are affected by nutritional status. It is well documented that breastfeeding  
80 provides many important health benefits to children and mothers and is considered the  
81 gold standard in infant feeding.<sup>1,2</sup>

82 The World Health Organization (WHO) recommends exclusive breastfeeding for the first  
83 6 months of life as an ideal feed, and continuation of breastfeeding for at least the first  
84 and second years, which is also supported by many health organizations.<sup>1-6</sup> However, the  
85 European Society for Paediatric Gastroenterology, Hepatology and Nutrition  
86 (ESPGHAN) differs in the recommendation of the age when complementary feed should  
87 be included because of the risk of food allergies.<sup>7</sup> The World Health Assembly, as part  
88 of its Global Strategy for the Feeding of Infants and Young Children, encouraged Member  
89 States to promote exclusive breastfeeding for 6 months as a global public health  
90 recommendation which provides many benefits to babies, reduces the risk of diseases and  
91 helps to promote good physical and cognitive growth.<sup>8,9</sup>

92 However, the rates of breastfeeding at 6 months remain low in Europe; and even in  
93 countries where initial rates are high, there is a marked decrease by the sixth month.<sup>10-11</sup>  
94 Early cessation of breastfeeding and the introduction of solids before 4 months could have  
95 considerable adverse effects on the children and women's health.<sup>12-15</sup> Therefore, it is  
96 important to elucidate what are the reasons behind the failure to achieve the  
97 recommendations, and there is a need for greater efforts to disseminate the benefits of  
98 breastfeeding and create a social environment that could favour it.

99 Although infant development is a process that is influenced by several factors,  
100 breastfeeding in the first months of life is a key determinant for optimal growth and  
101 adequate cognitive and motor development. Additionally, breastfeeding provides quality  
102 nutrients improvement (higher proportion of unsaturated fatty acids), prevents  
103 gastrointestinal infection and decreases the risk of diseases later in life such as allergies,  
104 asthma, obesity and celiac disease.<sup>2,3,7,9,12,16-19</sup>

105 Thus, motor development and cognitive function represent indicators of overall  
106 development during the first years. Motor development allows the acquisition of skills  
107 that will contribute to a child's full participation in activities, avoiding sedentary  
108 behaviours and will help to establish a direct and active relationship with the

1  
2  
3 109 environment.<sup>20,21</sup> Although consistent evidence of the positive effects of extended  
4  
5 110 breastfeeding on cognitive function has been reported,<sup>22</sup> few studies have focused on  
6  
7 111 motor development. The relationship between motor development and breastfeeding is  
8  
9 112 difficult to analyse because incomplete control for confounders is reported in the current  
10  
11 113 literature, even when various assessments of motor milestones are considered across  
12  
13 114 studies. To date, no clear associations between the duration of breastfeeding and motor  
14  
15 115 development have been reported.<sup>23-26</sup>

16 116 The purpose of this study protocol is to provide a clear methodology to review the effects  
17  
18 117 of breastfeeding practices on motor development in children, in terms of duration and  
19  
20 118 exclusive or not exclusive breastfeeding.

21  
22 119

## 23 24 120 **OBJECTIVE**

25  
26 121 The aim of this protocol study is to present an objective and transparent methodology to  
27  
28 122 conduct a systematic review and meta-analysis aimed to increase knowledge and  
29  
30 123 understanding of the associations between the duration and exclusivity of breastfeeding  
31  
32 124 and motor development in children age 0 to 10 years old.

33  
34 125

## 35 36 126 **METHODS AND ANALYSIS**

37  
38  
39 127 The methodology of this protocol was reported in accordance with the Preferred  
40  
41 128 Reporting Items for Systematic Reviews and Meta-analyses Protocols (PRISMA-P)<sup>27</sup>.  
42  
43 129 The Meta-analysis of observational studies in epidemiology: a proposal for reporting  
44  
45 130 (MOOSE<sup>28</sup>), the Preferred Reporting Items for Systematic Reviews and Meta-analyses  
46  
47 131 (PRISMA) and Cochrane Collaboration Handbook<sup>29</sup> will be used to report and guide the  
48  
49 132 review methods. This protocol was registered with PROSPERO, (Registration number  
50  
51 133 CRD42018093706) on 24 April 2018.

52  
53 134

## 54 135 **Inclusion/exclusion criteria for study selection**

55  
56 136 Studies will be retrieved from the literature by searching for studies which measure the  
57  
58 137 effects of breastfeeding duration and type (exclusivity, even if it is little, or no exclusive  
59  
60 138 breastfeeding), and report any type of measure of motor development. To be considered

1  
2  
3 139 for inclusion, studies will be required to meet the following criteria: (i) children age 0 to  
4 140 10 years old (ii) exposure, breastfeeding in terms of duration and type (exclusivity or non-  
5 141 exclusivity) and reported any type of measure; (iii) outcome, motor development  
6 142 measured using standardised tests; and (iv) studies written in English or Spanish.

7  
8  
9  
10 143 Studies will be excluded when: (i) include infants born in multiple pregnancies, with  
11 144 congenital infections or special circumstances requiring intensive care or hospitalization  
12 145 during the neonatal period; (ii) include children with mental disorders or any detected  
13 146 delay in communication, cognition or motor skills; (ii) breast milk has been  
14 147 supplemented, (iii) multiple publication derived from a single study; and (iv) do not adjust  
15 148 for confounding variates such as socioeconomic status and home environment.

16  
17  
18  
19  
20  
21 149

## 22 150 **Search methods for the identification of studies**

### 23 151 **Search strategy**

24  
25  
26  
27 152 The literature search will be conducted in MEDLINE (via PubMed), EMBASE (via  
28 153 Scopus), Web of Science and Cochrane Library from inception to December 2019.  
29 154 Searches for unpublished studies will be conducted at: OPEN GRAY, ProQuest  
30 155 dissertations & Thesis Global, Theseo, Networked digital library of theses and  
31 156 dissertations (NDLTD), and Google Scholar. A search of ClinicalTrials.gov and EudraCT  
32 157 clinical trial records will also be conducted. The searches will be reviewed immediately  
33 158 prior to the final analysis in order to identify further potential studies. Study records will  
34 159 be managed using the Mendeley reference manager.

35  
36  
37  
38  
39  
40 160 The following search terms will be combined: breastfeeding, feeding, 'exclusive  
41 161 breastfeeding', breastfed, 'breast suckling', suckling, 'motor skill', 'psychomotor  
42 162 performance', 'motor development', 'psychomotor development', 'development  
43 163 milestones', children, child, infant, childhood (Table 1). Previous reviews and meta-  
44 164 analyses will be screened, as well as the reference lists of the selected studies to complete  
45 165 the literature search.

46  
47  
48  
49  
50  
51 166

52  
53 167

54  
55 168

56  
57 169

58  
59 170



**Table 1** Search strategy for MEDLINE database

|                   |     |                     |     |           |
|-------------------|-----|---------------------|-----|-----------|
| Breastfeeding     | AND | 'motor skills'      | AND | children  |
| OR                |     | OR                  |     | OR        |
| feeding           |     | 'psychomotor        |     | child     |
| OR                |     | performance'        |     | OR        |
| 'exclusive        |     | OR                  |     | infant    |
| breastfeeding'    |     | 'motor development' |     | OR        |
| OR                |     | OR                  |     | childhood |
| breastfed         |     | 'psychomotor        |     |           |
| OR                |     | development'        |     |           |
| 'breast suckling' |     | OR                  |     |           |
| OR                |     | 'motor development  |     |           |
| 'suckling'        |     | milestones'         |     |           |

### 173 Selection of studies and data extraction

174 Two researchers will screen all relevant titles and abstracts of the retrieved publications  
 175 to identify eligible studies. Inclusion and exclusion criteria will be applied to full texts to  
 176 identify all potentially eligible articles. Inconsistencies in data collection will be solved  
 177 by consensus. A third reviewer will be consulted when disagreements persist. The process  
 178 of identifying, screening and including/excluding articles will be illustrated using the  
 179 PRISMA<sup>27</sup> flow chart (Figure 1).

180 Finally, information about the main characteristics of the identified studies will be  
 181 extracted, including the following data: i) first author's name, ii) publication year, iii)  
 182 country, iv) study design, v) characteristics of the study population (sample size, age of  
 183 children at evaluation, gender and number of participants in each group), vi) breastfeeding  
 184 category (as defined in Table 2) and vii) test used for assessment of motor development,  
 185 vii (Table 2). The authors of the included studies will be contacted to request any missing  
 186 data.

**Table 2** Characteristics of studies included in the systematic review and/or meta-analysis

| Reference                                   | Country | Study design        | Population             |                             | Breastfeeding                                                  |                                                    | Outcome MD                    |                 |
|---------------------------------------------|---------|---------------------|------------------------|-----------------------------|----------------------------------------------------------------|----------------------------------------------------|-------------------------------|-----------------|
|                                             |         |                     | Sample size            | Sample age                  | Categories                                                     | n                                                  | Tool                          | Measurement     |
| First author's name and year of publication | Country | Design of the study | Number of participants | Age of participants (years) | Duration periods of exclusive breastfeeding /any breastfeeding | Number participants in each breastfeeding category | Instrument used to measure MD | Mean value (SD) |

189 Key: MD, Motor Development; SD: Standard Deviation

190

### 191 **Assessment of risk of bias**

192 Two independent researchers will be blinded to the authors, titles and years of publication  
 193 of the included studies to evaluate the risk of bias of each included study. The Critical  
 194 Appraisal Checklist for Analytical Cross-Sectional Studies from The Joanna Briggs  
 195 Institute will be used.<sup>30</sup> This tool evaluates the risk of bias according to eight items that  
 196 could be scored as “Yes”, “No”, “Unclear” or “Not applicable”.

197 The Newcastle-Ottawa Quality Assessment Scale<sup>31</sup> will be used to assess the risk of bias  
 198 of longitudinal studies, including case control and cohort studies. This tool evaluates the  
 199 risk of bias according to eight items which could be grouped in three categories: selection,  
 200 comparability and exposure or outcome (for case control or cohort studies, respectively).  
 201 Each study can be awarded one star for each item within the selection and exposure  
 202 categories, and a maximum of two stars in the comparability category.

203 Any disagreements over the assessment of quality will be solved by consensus. A third  
 204 researcher will be consulted if a consensus is not reached.

205

### 206 **Statistical analysis**

207 After data extraction, the reviewers will determine whether meta-analysis is possible. At  
 208 least four studies addressing the association between breastfeeding and motor  
 209 development will be required in order to conduct the meta-analysis. If meta-analysis is  
 210 possible, STATA V.15 software will be used. The standardized mean difference will be

1  
2  
3 211 calculated for each study reporting the association between breastfeeding category and  
4  
5 212 motor development using Cohen's d index.<sup>32</sup> To compute the pooled effect size (ES)  
6  
7 213 estimates with 95% confidence intervals (CIs) fixed-effects models<sup>33</sup> will be used in the  
8  
9 214 case of no heterogeneity; otherwise, random-effects model<sup>34,35</sup> will be used. We will  
10  
11 215 compare the level of motor development in children who have been exclusively breastfed  
12  
13 216 or breastfed for any length of time, as a reference group, with the motor development of  
14  
15 217 those who have never been breastfed. If possible, a comparison between children  
16  
17 218 breastfed for at least 6 months and children breastfed for less than 6 months will also be  
18  
19 219 carried out.

20  
21 220 We also will provide further information on the main confounders for our research. Some  
22  
23 221 confounders we will require in order to get full points of the quality assessment of the  
24  
25 222 published studies, are social class, mother's and father's education level, maternal age,  
26  
27 223 home stimulation and maternal smoking during pregnancy.

28  
29 224 Heterogeneity will be assessed by computing the I<sup>2</sup> statistic.<sup>36</sup> The values of I<sup>2</sup> will be  
30  
31 225 considered as follows: 0%–40% might not be important, 30%–60% may represent  
32  
33 226 moderate heterogeneity, 50%–90% may represent substantial heterogeneity and 75%–  
34  
35 227 100% represents considerable heterogeneity.

36  
37 228 Linear meta-analysis regression models will be used to explore whether covariates could  
38  
39 229 be associated with the magnitude of the effect and could explain the observed statistical  
40  
41 230 heterogeneity.<sup>36</sup> Finally, publication bias will be evaluated using a funnel plot according  
42  
43 231 to the method proposed by Egger.<sup>37</sup> When a meta-analysis is not feasible, we will perform  
44  
45 232 a narrative synthesis.

46  
47 233

#### 48 234 *Subgroup analysis and meta-regression*

49  
50 235 If enough studies are available, subgroup analysis will be conducted. Several meta-  
51  
52 236 regressions will be performed on study and sample characteristics including the type of  
53  
54 237 motor development assessment (i.e., gross or fine motor), gender, age of study  
55  
56 238 participants, birth weight, breastfeeding classification (never, less than 6 months or more  
57  
58 239 than 6 months) and aspects related to motor. If possible, the method of breast milk feeding  
59  
60 240 will be investigated by subgroup analysis. Furthermore, the design and risk of bias scores  
241  
242 of the studies will be considered for additional subgroup analysis. Additional potential  
moderating variables may be identified after reviewing the literature.

1  
2  
3 243  
4

5 244 *Sensitivity analysis*

6  
7  
8 245 We will perform sensitivity analysis by removing studies one by one from the main  
9 246 analysis to assess the robustness of the findings.

10  
11  
12 247 **Patient and Public Involvement**

13  
14 248 Existing databases will be used for the purpose of this study. Patients and public will not  
15 249 be involved in the design of this study. This review will assess the effect of breastfeeding  
16 250 on motor developmental outcomes in infants. Insights provided by this study could be  
17 251 used in clinical practice to ameliorate outcomes; specifically, motor development; of  
18 252 children in the population.

19  
20  
21  
22  
23 253

24  
25 254 **DISCUSSION**

26  
27  
28 255 The aim of this study is to present an objective and transparent methodology to conduct  
29 256 a systematic review and meta-analysis investigating whether the duration of  
30 257 breastfeeding is associated with motor development.

31  
32  
33 258 Many studies have examined whether breastfeeding in early life, a critical phase of  
34 259 development, could affect later cognitive function and motor development in  
35 260 children.<sup>20-22</sup> Infant development is a complex process, which encompasses several  
36 261 factors allowing the acquisition of skills that will contribute to the child's full  
37 262 participation in activities and help to establish a direct relationship with the  
38 263 environment.<sup>20</sup>

39  
40  
41  
42  
43  
44 264 Motor function is an accepted indicator of development during the first years of life.<sup>38-40</sup>  
45 265 It directly contributes to and reflects the relationship that the child establishes with the  
46 266 physical and social environments. In addition, motor development plays an important role  
47 267 in other areas of development, such as physical growth and cardiorespiratory fitness, the  
48 268 latter being a powerful and effective indicator of cardiovascular health.<sup>41-43</sup> Poor motor  
49 269 development performance may incline children towards activity avoidance and sedentary  
50 270 behaviours, which are linked to increased risk of chronic disease in adulthood.<sup>44</sup>

51  
52  
53  
54  
55  
56  
57 271 There is considerable evidence about the long- and short-term benefits of breastfeeding  
58 272 for infant health.<sup>16-19</sup> However, no consensus has been reached about the effects of

1  
2  
3 273 breastfeeding on motor development, and the results and conclusions of existing studies  
4 are controversial.<sup>21,25,26</sup> The complexity of child development makes it difficult to  
5 274 evaluate these effects, and certain aspects of infant development are influenced by  
6 275 psychosocial and socioeconomic factors, which could contribute to some of the observed  
7 276 differences. The scientific evidence regarding the benefits of breastfeeding in terms of  
8 277 motor development outcomes is weak, and the strength of this association is controversial  
9 278 because most studies lack adequate control for potential confounders. Furthermore,  
10 279 previous studies have measured infant development using different standardised tests.  
11 280

12 281 Potential limitations of this research could include publication bias, information bias,  
13 282 inclusion of articles in English and Spanish only, analysis of cross-sectional studies as  
14 283 this does not allow a causal association to be evaluated (breastfeeding always precedes  
15 284 motor development), poor statistical analysis and inadequate reporting of methods and  
16 285 findings of the primary studies. To overcome these limitations, the systematic review and  
17 286 meta-analysis will be conducted and reported by two independent reviewers and a third  
18 287 researcher will be consulted if inconsistencies exist in data collection or consensus is not  
19 288 reached. However, despite these strategies, is not possible to ensure the lack of risk of  
20 289 bias. Furthermore; existing guidelines, the MOOSE statement, PRISMA, and Cochrane  
21 290 Collaboration Handbook recommendations will be followed.

22 291 To summarise, we will carry out a systematic review and meta-analysis with the objective  
23 292 of reviewing existing literature on the relationship between breastfeeding and motor  
24 293 development. Despite the fact that some aspects of motor development appear to be  
25 294 controversial, if this study confirms the positive effects of breastfeeding on motor skills  
26 295 development, it could encourage greater interest in breastfeeding within the areas of  
27 296 public and child health.

28 297 The lack of evidence on the effect of breastfeeding and motor skills development  
29 298 highlights the need for guidelines or recommendations based on rigorous and updated  
30 299 reviews summarizing the available scientific evidence, to be used in daily practice in  
31 300 order to improve the quality and effectiveness of interventions. The findings of this  
32 301 review could lead to an improvement in the health status and development of children  
33 302 worldwide.

34 303

35 304

1  
2  
3 305 **ETHICS AND DISSEMINATION**  
4

5 306 The data included in this project will be provide by the original studies; therefore, ethical  
6  
7 307 approval and informed consent of patients will not be required.  
8

9  
10 308 This protocol provides a clear and structured procedure to extract relevant information on  
11  
12 309 the association of breastfeeding and motor skills. This study will have clinical and public  
13  
14 310 health implications, because it could provide support for recommendations on  
15  
16 311 breastfeeding, which might help to prevent low rates of breastfeeding and early  
17  
18 312 abandonment. Suggestions for future research will be made according to the findings of  
19  
20 313 this systematic review and meta-analysis, and evidence-based recommendations to  
21  
22 314 improve breastfeeding rates will be offered. Moreover, longitudinal studies will be  
23  
24 315 needed to confirm the duration effect of breastfeeding better associate with children's  
25  
26 316 motor development.  
27

28 317  
29 318 **Contributors:**

30 319 BN-P and MH-L designed the study. BN-P was the principal investigator and guarantor.  
31  
32 320 BN-P and MH-L were the main coordinators of the study. DPP-C, CA-B, CB-M, VM-V  
33  
34 321 and BN-P conducted the study. MH-L, DPP-C and VM-V gave statistical and  
35  
36 322 epidemiological support. MH-L wrote the article with the support of CB-M, VM-V and  
37  
38 323 BN-P. All authors reviewed and approved the final version of the manuscript.  
39

40 324 **Competing interests:**

41  
42 325 None declared. All authors have completed the ICMJE uniform disclosure form at  
43  
44 326 [www.icmje.org/coi\\_disclosure.pdf](http://www.icmje.org/coi_disclosure.pdf) and declare: no support from any organisation for the  
45  
46 327 submitted work; no financial relationships with any organisations that might have an  
47  
48 328 interest in the submitted work in the previous three years; no other relationships or  
49  
50 329 activities that could appear to have influenced the submitted work.

51 330 **Funding statement:**

52  
53  
54 331 This work was not supported by any external grants or funding.

55  
56 332 **Data sharing:**

57  
58  
59 333 Extra data is available by emailing: [celia.alvarezbueno@uclm.es](mailto:celia.alvarezbueno@uclm.es)  
60

1  
2  
3 334 **Transparency**  
4

5 335 The manuscripts guarantor (BN-P) affirms that the manuscript is an honest, accurate, and  
6  
7 336 transparent account of the study being reported; that no important aspects of the study  
8  
9 337 have been omitted; and that any discrepancies from the study as planned have been  
10  
11 338 explained.

12  
13 339 **REFERENCES**  
14

- 15 340 1. World Health Organization/UNICEF. *Global Strategy for Infant and Young Child*  
16 341 *Feeding*. Geneva: WHO, 2003.
- 17 342 2. Kramer MS, Kaluma R. Optimal duration of exclusive breastfeeding. *Cochrane*  
18 343 *Database of Syst Rev*. 2012;8:CD003517.
- 19 344 3. World Health Organization. *Infant and young child feeding*. Geneva: WHO 2017.
- 20 345 4. Organización Panamericana de la Salud. *Principios de Orientación para la*  
21 346 *Alimentación complementaria del niño amamantado*. Washington DC: PAHO,  
22 347 2003.
- 23 348 5. Kleinman RE, Greer FR. American Academy of Pediatrics Committee on  
24 349 Nutrition. Complementary feeding. *Pediatric Nutrition*. 7th ed. Elk Grove Village,  
25 350 IL: American Academy of Pediatrics; 2014. p. 123.
- 26 351 6. Infant Feeding Guidelines. From birth to 12 months. 2015. [www.gov.wales](http://www.gov.wales).  
27 352 Accessed 28 May 2018.
- 28 353 7. Fewtrell M, Bronsky J, Campoy C, Domellöf M, Embleton N, Fidler Mis N, et al.  
29 354 Complementary feeding: A position Paper by the European Society for Paediatric  
30 355 Gastroenterology, Hepatology, and Nutrition (ESPGHAN) Committee on  
31 356 nutrition. *J Pediatr Gastroenterol Nutr*. 2017;64:119–132.
- 32 357 8. World Health Organization. *65ª Asamblea Mundial de la Salud. Plan de*  
33 358 *aplicación integral sobre nutrición materna, del lactante y del niño pequeño*.  
34 359 OMS; 2012.
- 35 360 9. Vestergaard M, Obel C, Henriksen TB, Sorensen HT, Skajaa, E, Ostergaard J.  
36 361 Duration of breastfeeding and developmental milestones during the latter half of  
37 362 infancy. *Acta Paediatr*. 1999;88:1327–1332.
- 38 363 10. Comité de Lactancia Materna de la Asociación Española de Pediatría. *Lactancia*  
39 364 *Materna en cifras: Tasas de inicio y duración de la Lactancia Materna en España*  
40 365 *y otros países*. 2016

- 1  
2  
3 366 11. Rius JM, Ortuño J, Rivas C, Maravall M, Calzado MA, López A, et al. Factores  
4 asociados al abandono precoz de la lactancia materna en una región del este de  
5 367 España. *An Pediatr (Barc)*. 2014;80:6–15.  
6 368  
7  
8 369 12. Smith HA, Becker GE. Early additional food and fluids for healthy breastfed full-  
9 term infants. *Cochrane Database Syst Rev*. 2016;8:CD006462.  
10 370  
11 371 13. Chowdhury R, Sinha B, Sankar MJ, Taneja S, Bhandari N, Bahl R, et al.  
12 Breastfeeding and maternal health outcomes: a systematic review and meta-  
13 372 analysis. *Acta Paediatr Suppl*. 2015;104:96–113.  
14 373  
15 374 14. European Food Safety Authority. Panel on Dietetic Products NAD: Scientific  
16 opinion on the appropriate age for introduction of complementary feeding of  
17 375 infants. *Eur Food Safet Authority J*. 2009;7:1423.  
18 376  
19 377 15. Quasen W, Fenton TR, Friel JK. Age of introduction of first complementary  
20 378 feeding for infants: a systematic review. *BMC Pediatr*. 2015:107.  
21 379  
22 380 16. Horta BL, Victoria CG. Short-term effects of breastfeeding a systematic review  
23 of benefits of breastfeeding on diarrhoea and pneumonia mortality. Geneva:  
24 381 World Health Organization; 2013.  
25 382  
26 383 17. Horta BL, Victoria CG. Long-term effects of breastfeeding: a systematic review.  
27 Geneva: World Health Organization; 2013.  
28 384  
29 385 18. Umer A, Hamilton C, Edwards RA, et al. Association Between Breastfeeding and  
30 386 Childhood Cardiovascular Disease Risk Factors. *Matern Child Health J*  
31 2019;23:228–39. doi:10.1007/s10995-018-2641-8.  
32 387  
33 388 19. Horta BL, de Lima NP. Breastfeeding and Type 2 Diabetes: Systematic Review  
34 and Meta-Analysis. *Curr Diab Rep* 2019;19:1. doi:10.1007/s11892-019-1121-x.  
35 389  
36 390 20. Pollitt E, Caycho T. Desarrollo motor como indicador del desarrollo infantil  
37 durante los primeros dos años de vida. *Revista de Psicología*: 2010;28:381–409.  
38 Available at: <http://www.redalyc.org/articulo.oa?id=337829515007>> ISSN 0254-  
39 9247. Accessed on 26 August 2018.  
40 391  
41 392 21. Michels KA, Ghassabian A, Mumford SL, Sundaram R, Bell EM, Bello SC, et al.  
42 Breastfeeding and motor development in term and preterm infants in a  
43 393 longitudinal US cohort. *Am J Clin Nutr*. 2017;106(6):1456–1462.  
44 394  
45 395 22. Anderson JW, Johnstone BM, Remley DT. Breast-feeding and cognitive  
46 development: a meta-analysis. *Am J Clin Nutr*. 1999;70:525–535.  
47 396  
48 397  
49  
50  
51  
52  
53  
54  
55  
56  
57  
58  
59  
60



1  
2  
3  
4  
5  
6  
7  
8  
9  
10  
11  
12  
13  
14  
15  
16  
17  
18  
19  
20  
21  
22  
23  
24  
25  
26  
27  
28  
29  
30  
31  
32  
33  
34  
35  
36  
37  
38  
39  
40  
41  
42  
43  
44  
45  
46  
47  
48  
49  
50  
51  
52  
53  
54  
55  
56  
57  
58  
59  
60

23. Thorsdottir I, Gunnarsdottir I, Kvaran MA, Gretarsson SJ. Maternal body mass index, duration of exclusive breastfeeding and children's developmental status at the age of 6 years. *Eur J Clin Nutr.* 2005 Mar;59(3):426–431.
24. Chiu WC, Liao HF, Chang PJ, Chen PC, Chen YC. Duration of breast feeding and risk of developmental delay in Taiwanese children: a nationwide birth cohort study. *Paediatr Perinat Epidemiol.* 2011;25:519–527
25. Sacker A, Quigley MA, Kelly YJ. Breastfeeding and developmental delay: findings from the millennium cohort study. *Pediatrics.* 2006;118:e682–e689.
26. Dee DL, Li R, Lee LC, Grummer-Strawn LM. Associations between breastfeeding practices and young children's language and motor skill development. *Pediatrics.* 2007;119(Suppl. 1):S92–S98.
27. Moher D, Shamseer L, Clarke M, Ghersi D, Liberati A, Petticreq M, et al. Preferred reporting items for systematic review and meta-analysis protocols (PRISMA-P) 2015 statement. *Syst Rev.* 2015;4:1.
28. Stroup DF, Berlin JA, Morton SC, et al. Meta-analysis of observational studies in epidemiology: a proposal for reporting. Meta-analysis Of Observational Studies in Epidemiology (MOOSE) group. *JAMA* 2000;283:2008–2012.
29. Higgins JPT, Green S. *Cochrane Handbook for Systematic Reviews of Interventions.* John Wiley & Sons 2011.
30. Moola S, Munn Z, Tufanaru C, Aromataris E, Sears K, Sfetcu R, et al. Chapter 7: Systematic reviews of etiology and risk. In: Aromataris E, Munn Z, editors. *Joanna Briggs Institute Reviewer's Manual.* The Joanna Briggs Institute, 2017. Available from <https://reviewersmanual.joannabriggs.org/>.
31. Wells GA, Shea B, O'Connell D, Peterson J, Welch V, Losos M, et al. *The Newcastle-Ottawa Scale (NOS) for Assessing the Quality of Nonrandomised Studies in Metaanalyses.* Ottawa: Ottawa Hospital Research Institute. Available from: [http://www.ohri.ca/programs/clinical\\_epidemiology/oxford.asp](http://www.ohri.ca/programs/clinical_epidemiology/oxford.asp). Accessed 31 May 2018.
32. Lipsey M, Wilson D. *Practical meta-analysis.* Thousand Oaks, CA: Sage Publications, 2001.
33. Leonard T, Duffy JC. A Bayesian fixed effects analysis of the Mantel-Haenszel model applied to meta-analysis. *Stat Med.* 2002;21:2295–2312.
34. DerSimonian R, Kacker R. Random-effects model for meta-analysis of clinical trials: An update. *Contemp Clin Trials.* 2007;28:105–114.

- 1  
2  
3 432 35. Borenstein M, Hedges L V., Higgins JPT, et al. A basic introduction to fixed-  
4 433 effect and random-effects models for meta-analysis. *Res Synth Methods*  
5 434 2010;1:97–111. doi:10.1002/jrsm.12  
6  
7  
8 435 36. Higgins JPT, Thompson SG. Quantifying heterogeneity in a meta-analysis. *Stat*  
9 436 *Med.* 2002;21:1539–1558.  
10  
11 437 37. Sterne JA, Egger M, Smith GD. Systematic reviews in health care: Investigating  
12 438 and dealing with publication and other biases in meta-analysis. *BMJ.* 2001; 323:  
13 439 101–5.  
14  
15 440 38. Rigby M, Köhler L, Mitch E. Blair, Metchler R. Child health indicators for  
16 441 Europe: a priority for a caring society. *Eur J Public Health.* 2003;13(3 Suppl):38–  
17 442 46.  
18  
19 443 39. Köhler L, Rigby M. Indicators of children's development: considerations when  
20 444 constructing a set of national Child Health Indicators for the European Union.  
21 445 *Child Care Health Dev.* 2003;29:551–558.  
22  
23 446 40. The WHO Multicentre Growth Reference Study (MGRS): Rationale, planning,  
24 447 and implementation. Available from  
25 448 <http://www.who.int/childgrowth/mgrs/fnu/en/index.html>. Accessed 15 June  
26 449 2018.  
27  
28 450 41. Artero EG, Ortega FB, España-Romero V, Labayen I, Huybrechts I, Papadaki A,  
29 451 et al. Longer breastfeeding is associated with increased lower body explosive  
30 452 strength during adolescence. *J Nutr.* 2010;140:1989–1995.  
31  
32 453 42. Ortega F, Ruiz J, Castillo M, Sjöström M. Physical fitness in childhood and  
33 454 adolescence: a powerful marker of health. *Int J Obes (Lond).* 2008;32:1–11.  
34  
35 455 43. Kodama S, Saito K, Tanaka S, Maki M, Yachi Y, Asumi M, et al.  
36 456 Cardiorespiratory fitness as a quantitative predictor of all-cause mortality and  
37 457 cardiovascular events in healthy men and women. *JAMA* 2009;301:2024–2035  
38  
39 458 44. Lucas BR, Elliott EJ, Coggan S, Pinto RZ, Jinkowic T, McCoy SW, et al.  
40 459 Interventions to improve gross motor performance in children with  
41 460 neurodevelopmental disorders: a meta-analysis. *BMC Pediatr.* 2016;16:193.  
42  
43  
44  
45  
46  
47  
48  
49  
50  
51  
52  
53  
54

## 462 TABLES LEGENDS

463 **Table 1.** Search strategy for the MEDILINE database.

1  
2  
3 464 **Table 2.** Characteristics of studies included in the systematic review and/or meta-  
4  
5 465 analysis.  
6

7 466 **FIGURE LEGENDS**  
8

9  
10 467 **Figure 1.** PRISMA (Preferred Reporting Items for Systematic Review and Meta-  
11 468 Analysis) flow diagram of identification, screening, eligibility and inclusion of studies  
12

13  
14 469  
15  
16  
17  
18  
19  
20  
21  
22  
23  
24  
25  
26  
27  
28  
29  
30  
31  
32  
33  
34  
35  
36  
37  
38  
39  
40  
41  
42  
43  
44  
45  
46  
47  
48  
49  
50  
51  
52  
53  
54  
55  
56  
57  
58  
59  
60

For peer review only

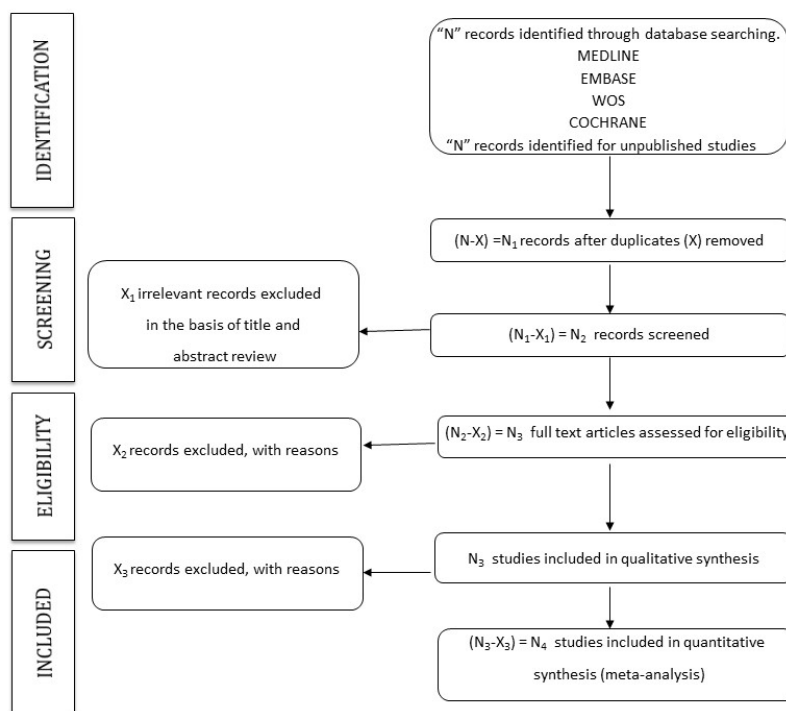

254x190mm (96 x 96 DPI)

**PRISMA-P (Preferred Reporting Items for Systematic review and Meta-Analysis Protocols) 2015 checklist: recommended items to address in a systematic review protocol\***

| Section and topic                 | Item No | Checklist item                                                                                                                                                                                                                |
|-----------------------------------|---------|-------------------------------------------------------------------------------------------------------------------------------------------------------------------------------------------------------------------------------|
| <b>ADMINISTRATIVE INFORMATION</b> |         |                                                                                                                                                                                                                               |
| Title:                            |         |                                                                                                                                                                                                                               |
| Identification: p. 1              | 1a      | Identify the report as a protocol of a systematic review                                                                                                                                                                      |
| Update: NA                        | 1b      | If the protocol is for an update of a previous systematic review, identify as such                                                                                                                                            |
| Registration: p. 2                | 2       | If registered, provide the name of the registry (such as PROSPERO) and registration number                                                                                                                                    |
| Authors: pp. 1, 13                |         |                                                                                                                                                                                                                               |
| Contact: p. 1                     | 3a      | Provide name, institutional affiliation, e-mail address of all protocol authors; provide physical mailing address of corresponding author                                                                                     |
| Contributions: p. 13              | 3b      | Describe contributions of protocol authors and identify the guarantor of the review                                                                                                                                           |
| Amendments: NA                    | 4       | If the protocol represents an amendment of a previously completed or published protocol, identify as such and list changes; otherwise, state plan for documenting important protocol amendments                               |
| Support: NA                       |         |                                                                                                                                                                                                                               |
| Sources                           | 5a      | Indicate sources of financial or other support for the review                                                                                                                                                                 |
| Sponsor                           | 5b      | Provide name for the review funder and/or sponsor                                                                                                                                                                             |
| Role of sponsor or funder         | 5c      | Describe roles of funder(s), sponsor(s), and/or institution(s), if any, in developing the protocol                                                                                                                            |
| <b>INTRODUCTION</b>               |         |                                                                                                                                                                                                                               |
| Rationale: pp 4, 5                | 6       | Describe the rationale for the review in the context of what is already known                                                                                                                                                 |
| Objectives p. 5                   | 7       | Provide an explicit statement of the question(s) the review will address with reference to participants, interventions, comparators, and outcomes (PICO)                                                                      |
| <b>METHODS</b>                    |         |                                                                                                                                                                                                                               |
| Eligibility criteria: pp. 5, 6    | 8       | Specify the study characteristics (such as PICO, study design, setting, time frame) and report characteristics (such as years considered, language, publication status) to be used as criteria for eligibility for the review |
| Information sources: p. 6         | 9       | Describe all intended information sources (such as electronic databases, contact with study authors, trial registers or other grey literature sources) with planned dates of coverage                                         |
| Search strategy: pp. 6, 7         | 10      | Present draft of search strategy to be used for at least one electronic database, including planned limits, such that it could be repeated                                                                                    |
| Study records: pp. 7, 8           |         |                                                                                                                                                                                                                               |
| Data management: p. 7             | 11a     | Describe the mechanism(s) that will be used to manage records and data throughout the review                                                                                                                                  |

|                                          |     |                                                                                                                                                                                                                                                  |
|------------------------------------------|-----|--------------------------------------------------------------------------------------------------------------------------------------------------------------------------------------------------------------------------------------------------|
| Selection process: p. 7                  | 11b | State the process that will be used for selecting studies (such as two independent reviewers) through each phase of the review (that is, screening, eligibility and inclusion in meta-analysis)                                                  |
| Data collection process: p. 7            | 11c | Describe planned method of extracting data from reports (such as piloting forms, done independently, in duplicate), any processes for obtaining and confirming data from investigators                                                           |
| Data items: pp 7, 10                     | 12  | List and define all variables for which data will be sought (such as PICO items, funding sources), any pre-planned data assumptions and simplifications                                                                                          |
| Outcomes and prioritization: pp. 7, 8    | 13  | List and define all outcomes for which data will be sought, including prioritization of main and additional outcomes, with rationale                                                                                                             |
| Risk of bias in individual studies: p. 8 | 14  | Describe anticipated methods for assessing risk of bias of individual studies, including whether this will be done at the outcome or study level, or both; state how this information will be used in data synthesis                             |
| Data synthesis: pp 9, 10                 | 15a | Describe criteria under which study data will be quantitatively synthesised                                                                                                                                                                      |
|                                          | 15b | If data are appropriate for quantitative synthesis, describe planned summary measures, methods of handling data and methods of combining data from studies, including any planned exploration of consistency (such as $I^2$ , Kendall's $\tau$ ) |
|                                          | 15c | Describe any proposed additional analyses (such as sensitivity or subgroup analyses, meta-regression)                                                                                                                                            |
|                                          | 15d | If quantitative synthesis is not appropriate, describe the type of summary planned                                                                                                                                                               |
| Meta-bias(es): NA                        | 16  | Specify any planned assessment of meta-bias(es) (such as publication bias across studies, selective reporting within studies)                                                                                                                    |
| Confidence in cumulative evidence: NA    | 17  | Describe how the strength of the body of evidence will be assessed (such as GRADE)                                                                                                                                                               |

**\* It is strongly recommended that this checklist be read in conjunction with the PRISMA-P Explanation and Elaboration (cite when available) for important clarification on the items. Amendments to a review protocol should be tracked and dated. The copyright for PRISMA-P (including checklist) is held by the PRISMA-P Group and is distributed under a Creative Commons Attribution Licence 4.0.**

*From: Shamseer L, Moher D, Clarke M, Ghersi D, Liberati A, Petticrew M, Shekelle P, Stewart L, PRISMA-P Group. Preferred reporting items for systematic review and meta-analysis protocols (PRISMA-P) 2015: elaboration and explanation. BMJ. 2015 Jan 2;349(jan02 1):g7647.*
